# Supplementary material for: Bioactive compounds from hemp (Cannabis sativa L.) seeds: optimization of phenolic antioxidant extraction using simplex lattice mixture design and HPLC-DAD/ESI-MS2 analysis
Source: Royal Society of Chemistry journal article supplement (doi:10.1039/d2ra04081f), 2022-01-01
Supplement: d2ra04081f1.pdf [file d2ra04081f1.pdf]

**Table S1.** Analysis of variance (ANOVA) of regression models for each studied response

| <b>ANOVA source</b> | <b>Sum of squares</b> | <b>df</b> | <b>F</b> | <b><i>p</i>-value</b> | <b>R<sup>2</sup></b> | <b>R<sup>2</sup> adjusted</b> |
|---------------------|-----------------------|-----------|----------|-----------------------|----------------------|-------------------------------|
| <b>TPC</b>          |                       |           |          |                       |                      |                               |
| Linear              | 579.709               | 2         | 1.97954  | 0.184                 | 0.26                 | 0.13                          |
| Quadratic           | 1495.964              | 3         | 34.77545 | 0.000061*             | 0.95                 | 0.91                          |
| Special Cubic       | 24.207                | 1         | 1.87223  | 0.213517              | 0.96                 | 0.92                          |
| Cubic               | 61.460                | 3         | 2.82121  | 0.171027              | 0.99                 | 0.96                          |
| <b>DPPH</b>         |                       |           |          |                       |                      |                               |
| Linear              | 84.271                | 2         | 0.37181  | 0.697829              | 0.06                 | 0.00                          |
| Quadratic           | 1202.992              | 3         | 73.59425 | 0.000004*             | 0.97                 | 0.95                          |
| Special Cubic       | 6.235                 | 1         | 1.16828  | 0.315581              | 0.97                 | 0.95                          |
| Cubic               | 21.424                | 3         | 1.79301  | 0.287819              | 0.99                 | 0.96                          |
| <b>ABTS</b>         |                       |           |          |                       |                      |                               |
| Linear              | 3891.78               | 2         | 1.93591  | 0.190396              | 0.26                 | 0.13                          |
| Quadratic           | 10249.81              | 3         | 33.87333 | 0.000068*             | 0.95                 | 0.91                          |
| Special Cubic       | 118.00                | 1         | 1.19900  | 0.309761              | 0.95                 | 0.91                          |
| Cubic               | 552.47                | 3         | 5.39896  | 0.068494              | 0.99                 | 0.97                          |
| <b>FRAP</b>         |                       |           |          |                       |                      |                               |
| Linear              | 121.926               | 2         | 0.23230  | 0.796499              | 0.04                 | 0.00                          |
| Quadratic           | 2673.444              | 3         | 33.42698 | 0.000071*             | 0.93                 | 0.88                          |
| Special Cubic       | 42.447                | 1         | 1.73935  | 0.228727              | 0.94                 | 0.89                          |
| Cubic               | 131.593               | 3         | 4.47184  | 0.090979              | 0.99                 | 0.96                          |
| <b>CUPRAC</b>       |                       |           |          |                       |                      |                               |
| Linear              | 522.043               | 2         | 0.67032  | 0.531256              | 0.11                 | 0.00                          |
| Quadratic           | 3742.558              | 3         | 18.45322 | 0.000593*             | 0.89                 | 0.82                          |
| Special Cubic       | 30.672                | 1         | 0.42086  | 0.537203              | 0.89                 | 0.80                          |
| Cubic               | 442.713               | 3         | 8.75143  | 0.031293*             | 0.98                 | 0.95                          |
| <b>TAC</b>          |                       |           |          |                       |                      |                               |
| Linear              | 3536.08               | 2         | 0.54770  | 0.593264              | 0.09                 | 0.00                          |
| Quadratic           | 32772.60              | 3         | 31.93539 | 0.000084*             | 0.93                 | 0.89                          |
| Special Cubic       | 12.30                 | 1         | 0.03161  | 0.863932              | 0.93                 | 0.87                          |
| Cubic               | 1924.69               | 3         | 3.20947  | 0.144728              | 0.98                 | 0.93                          |

\*Significant at  $p < 0.05$ .

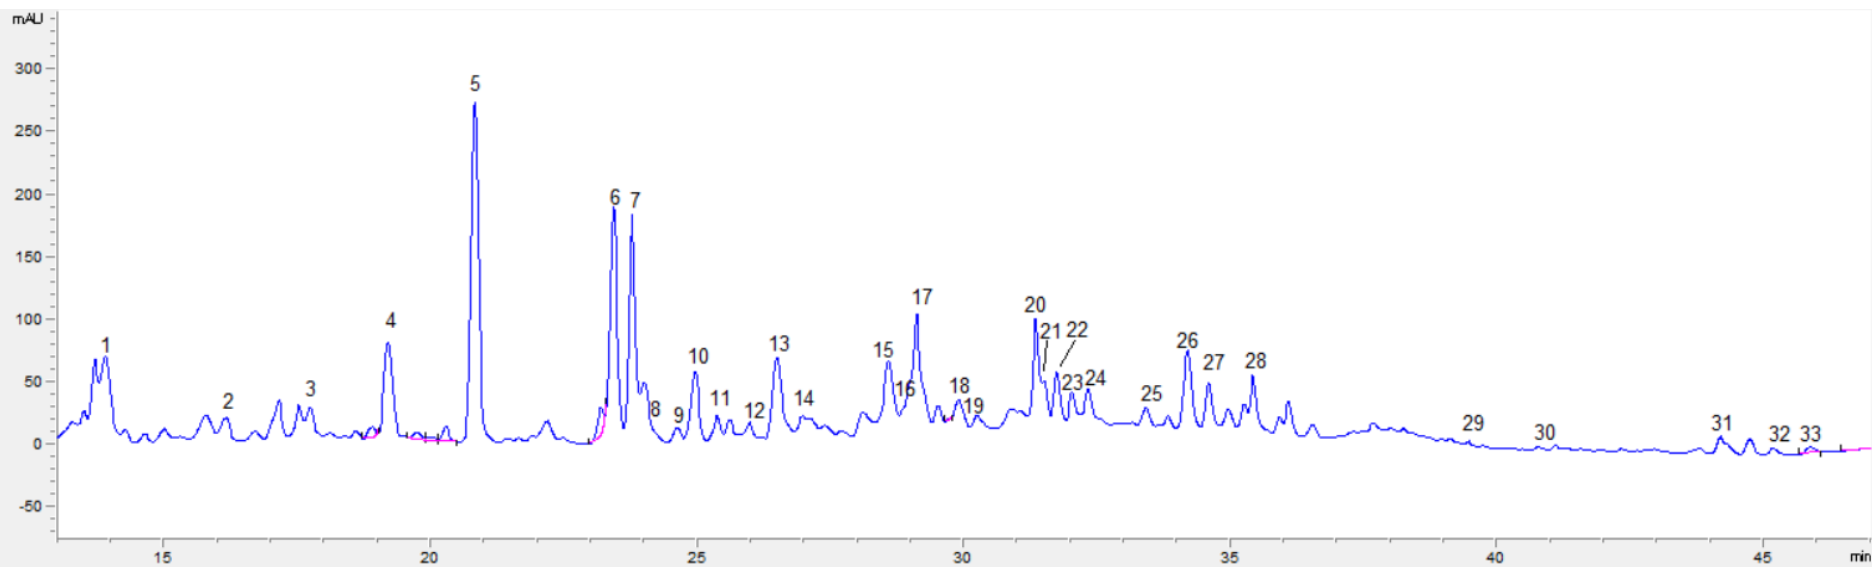

**Figure S1.** HPLC chromatogram detected at 280nm for the extracted compounds from defatted hemp seeds in the run 10

# *N-trans*-caffeoyltyramine isomer

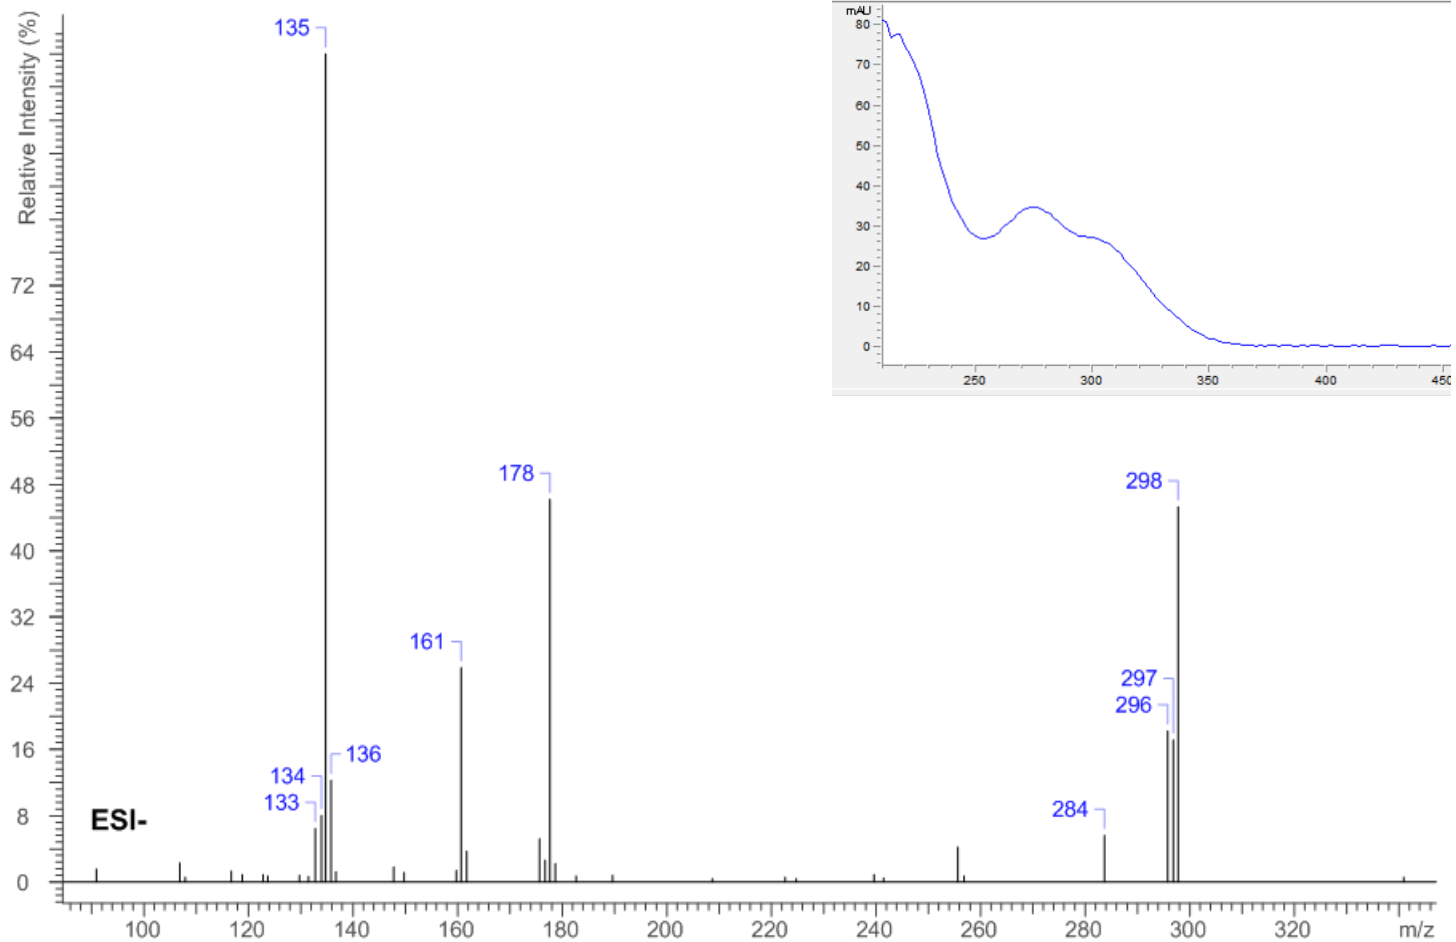

# *N-trans*-caffeoyltyramine

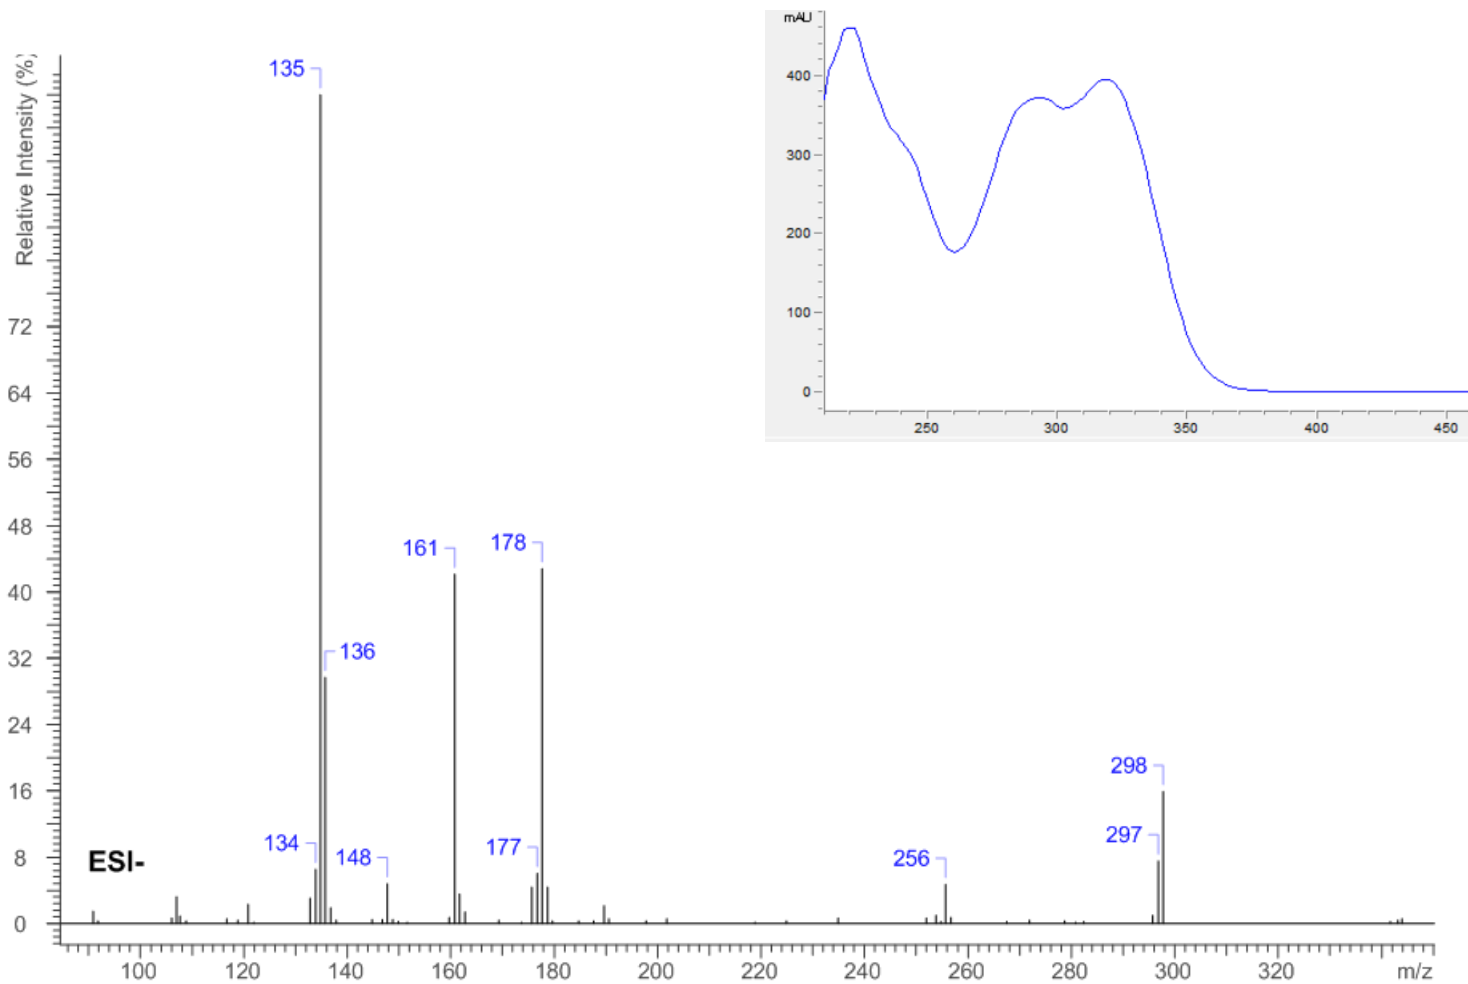

# Cannabisin A

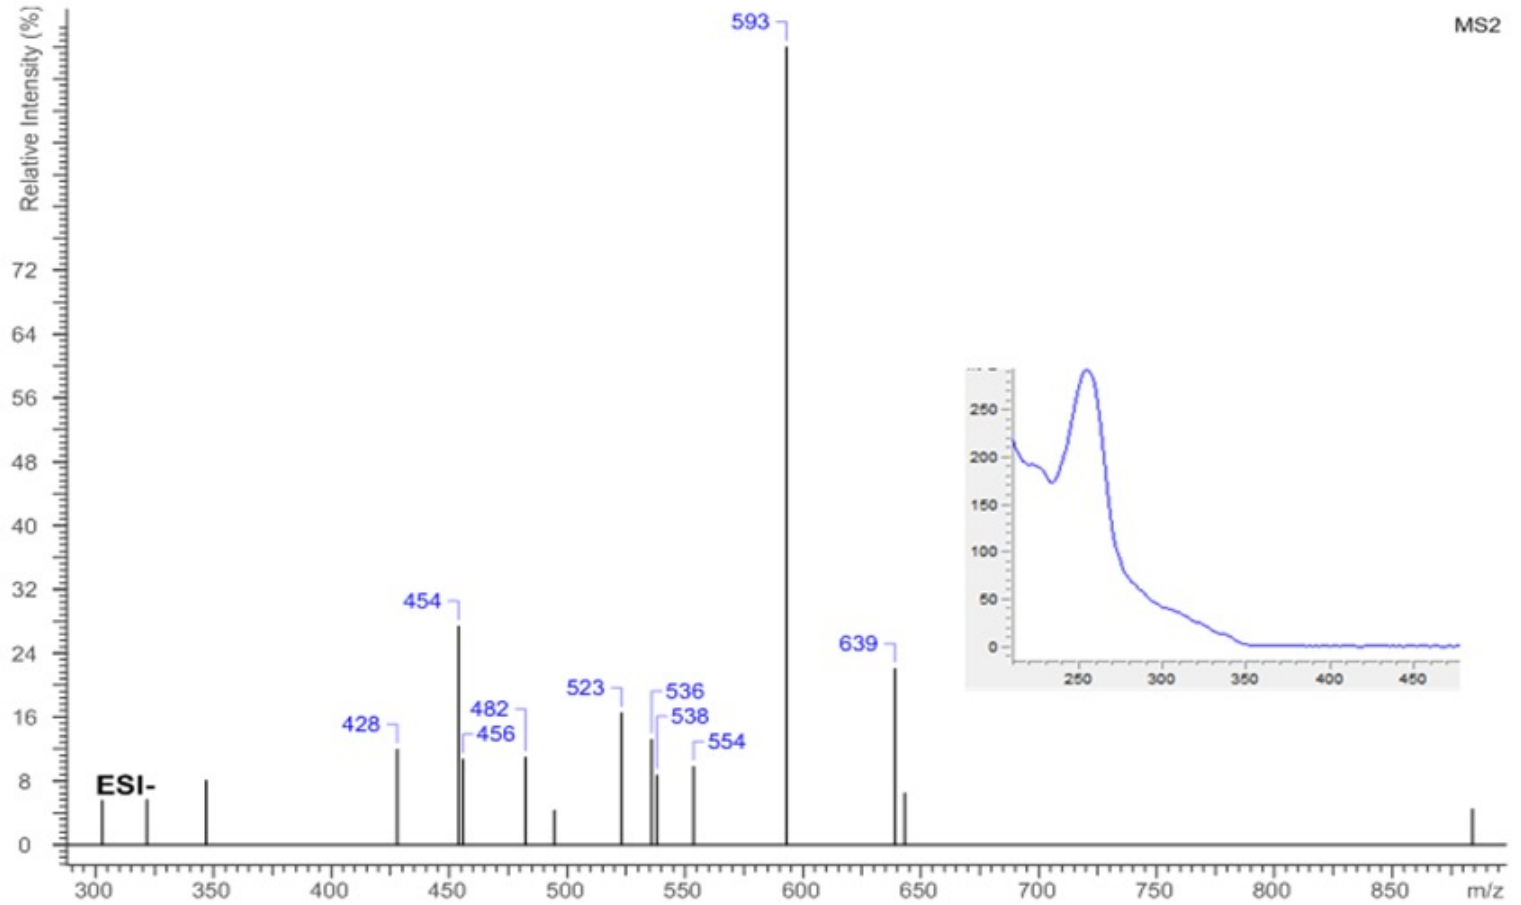

# Cannabisin B

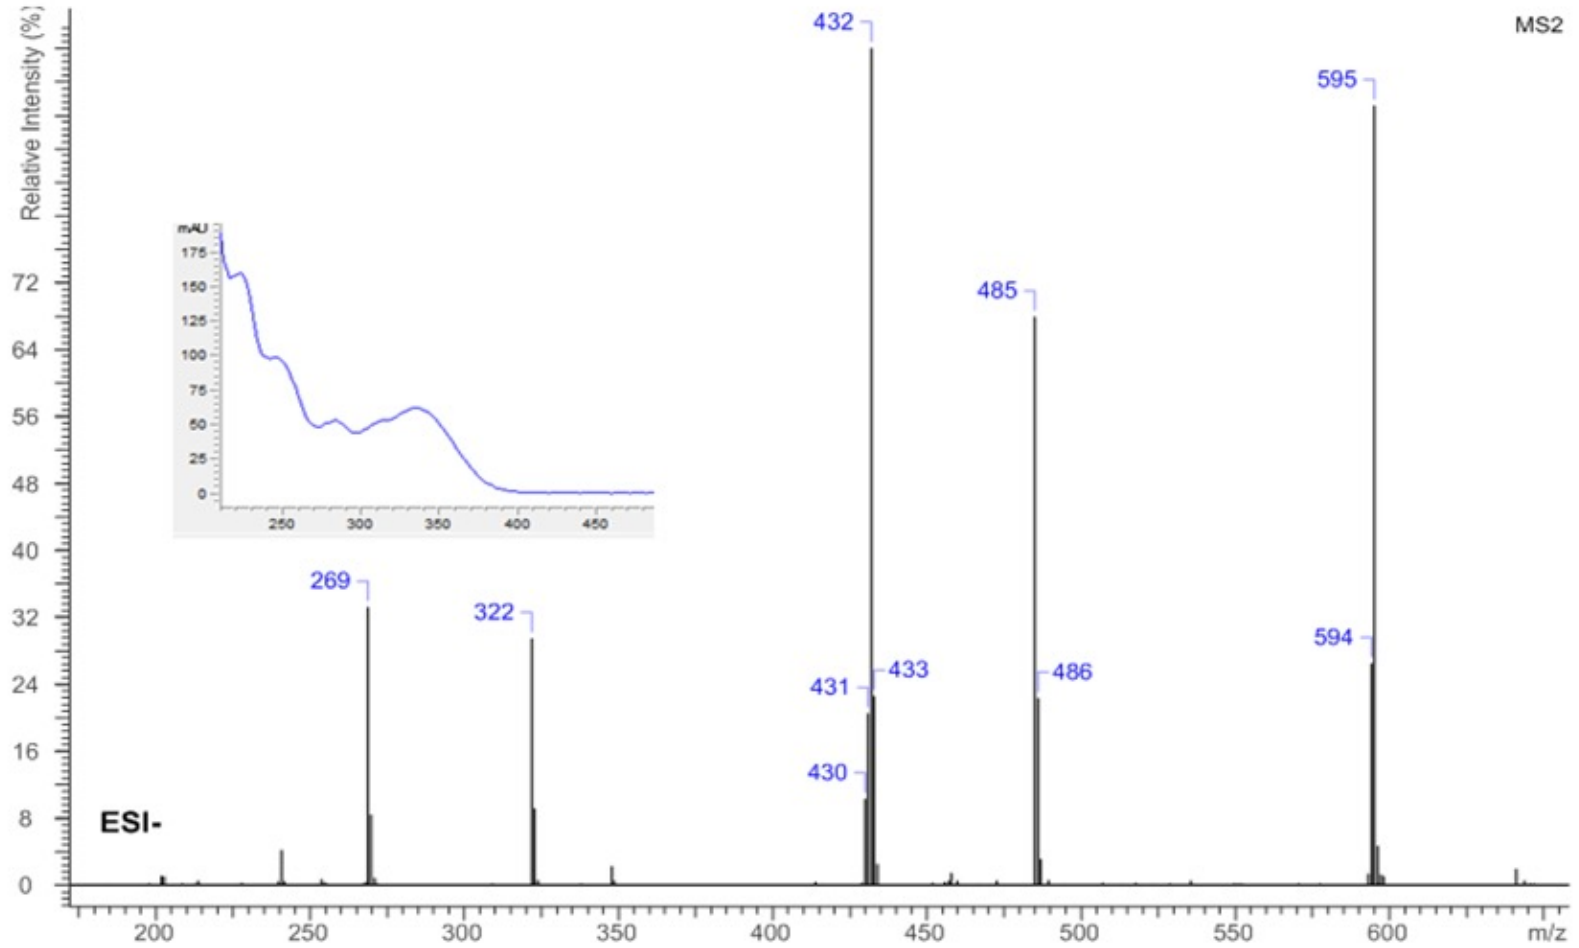

# Coumaroyltyramine

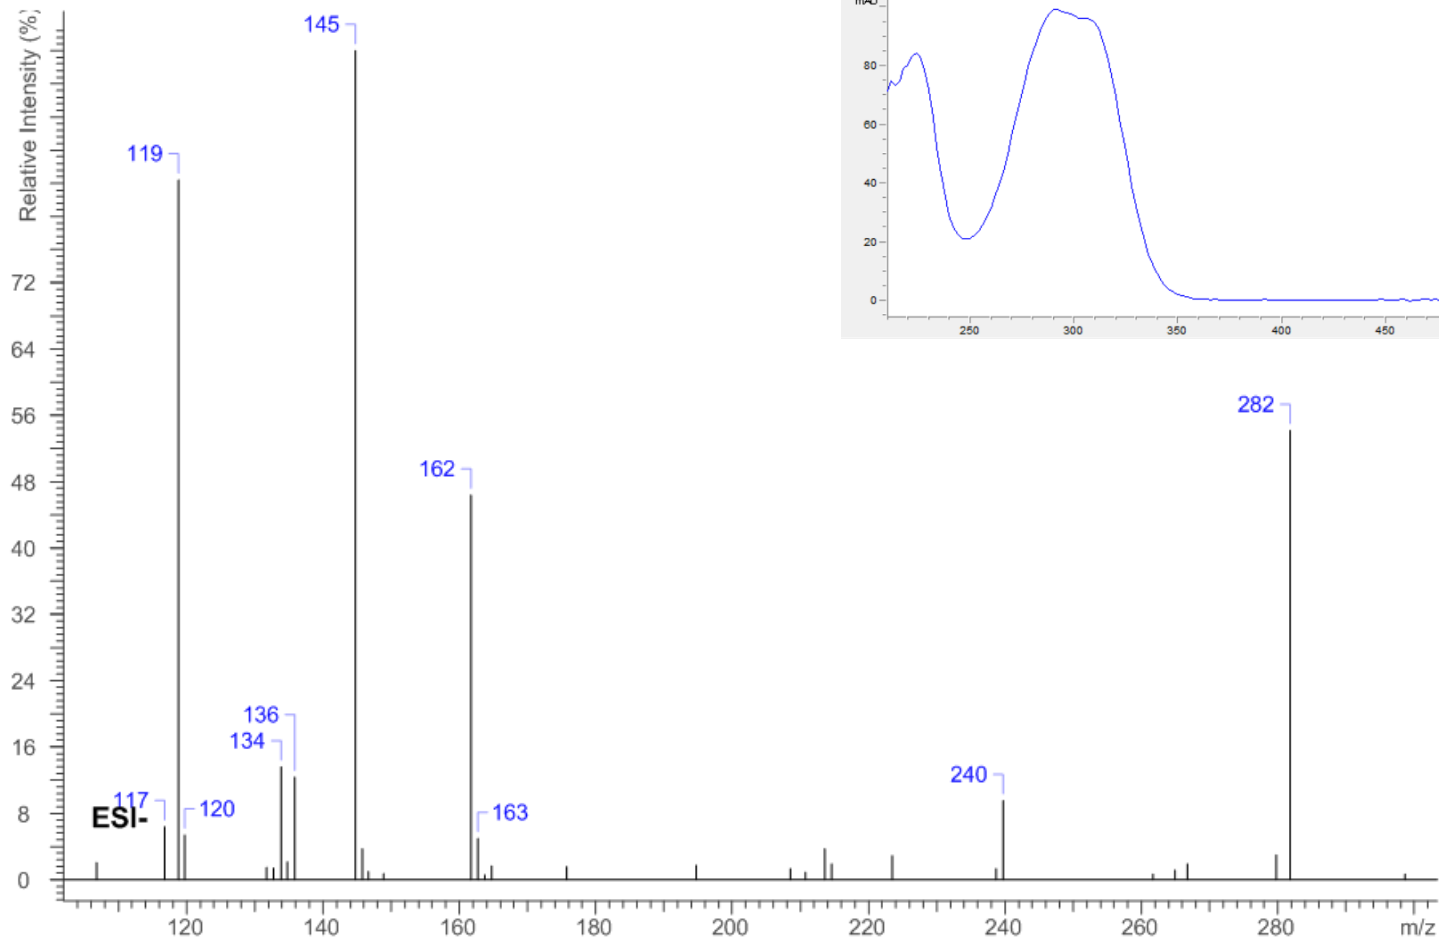

# Cannabisin B isomer1

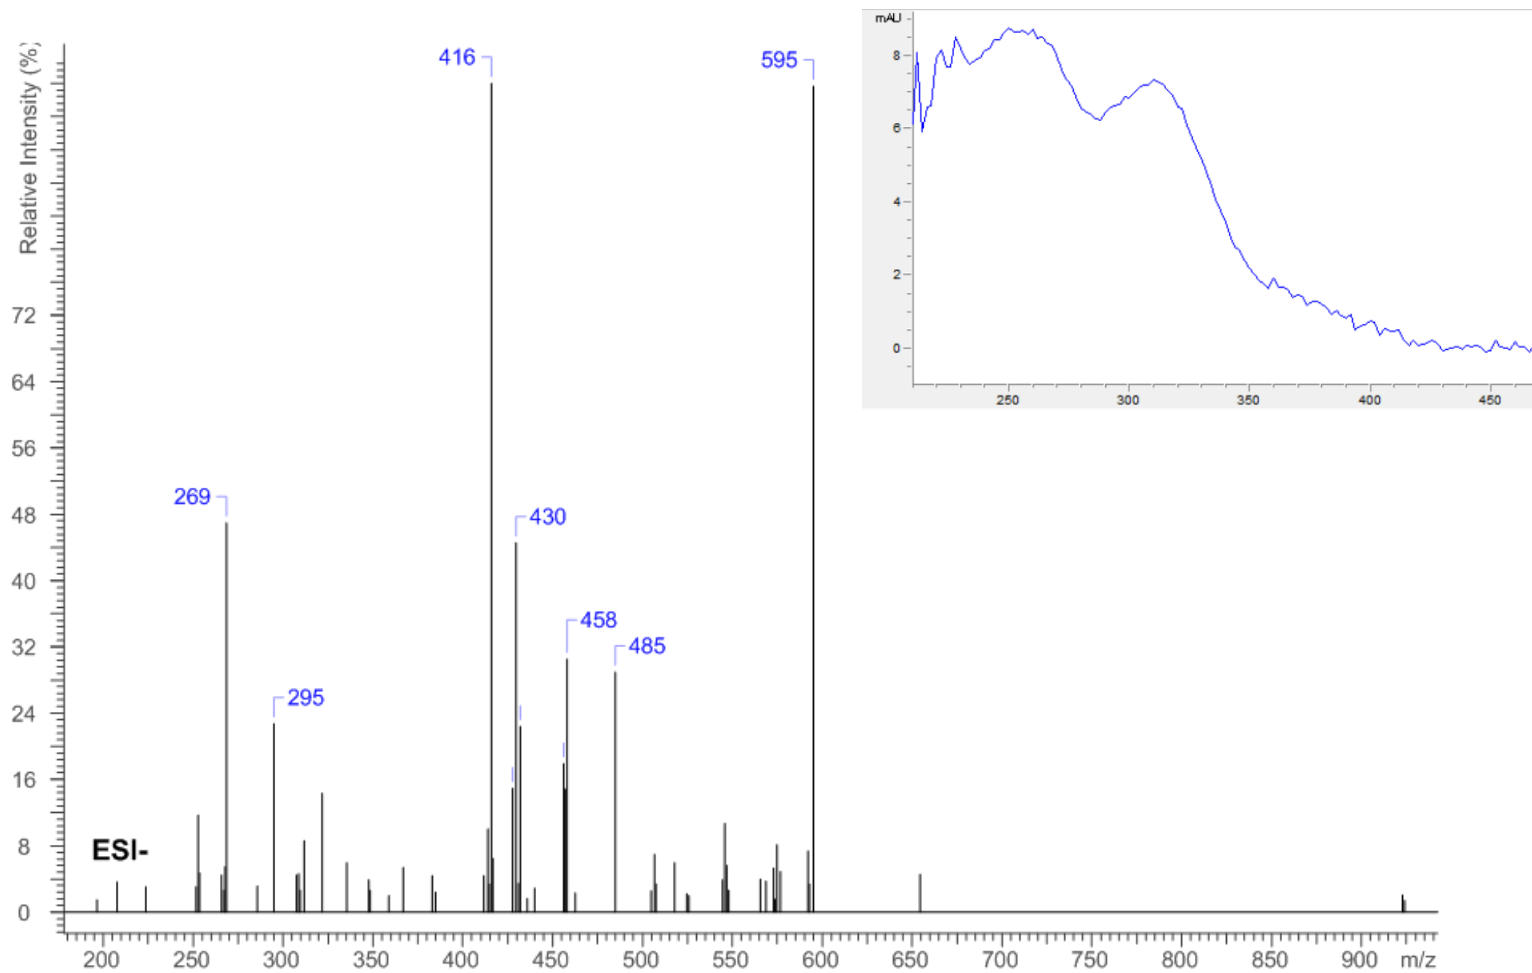



# N-Feruloyltyramine

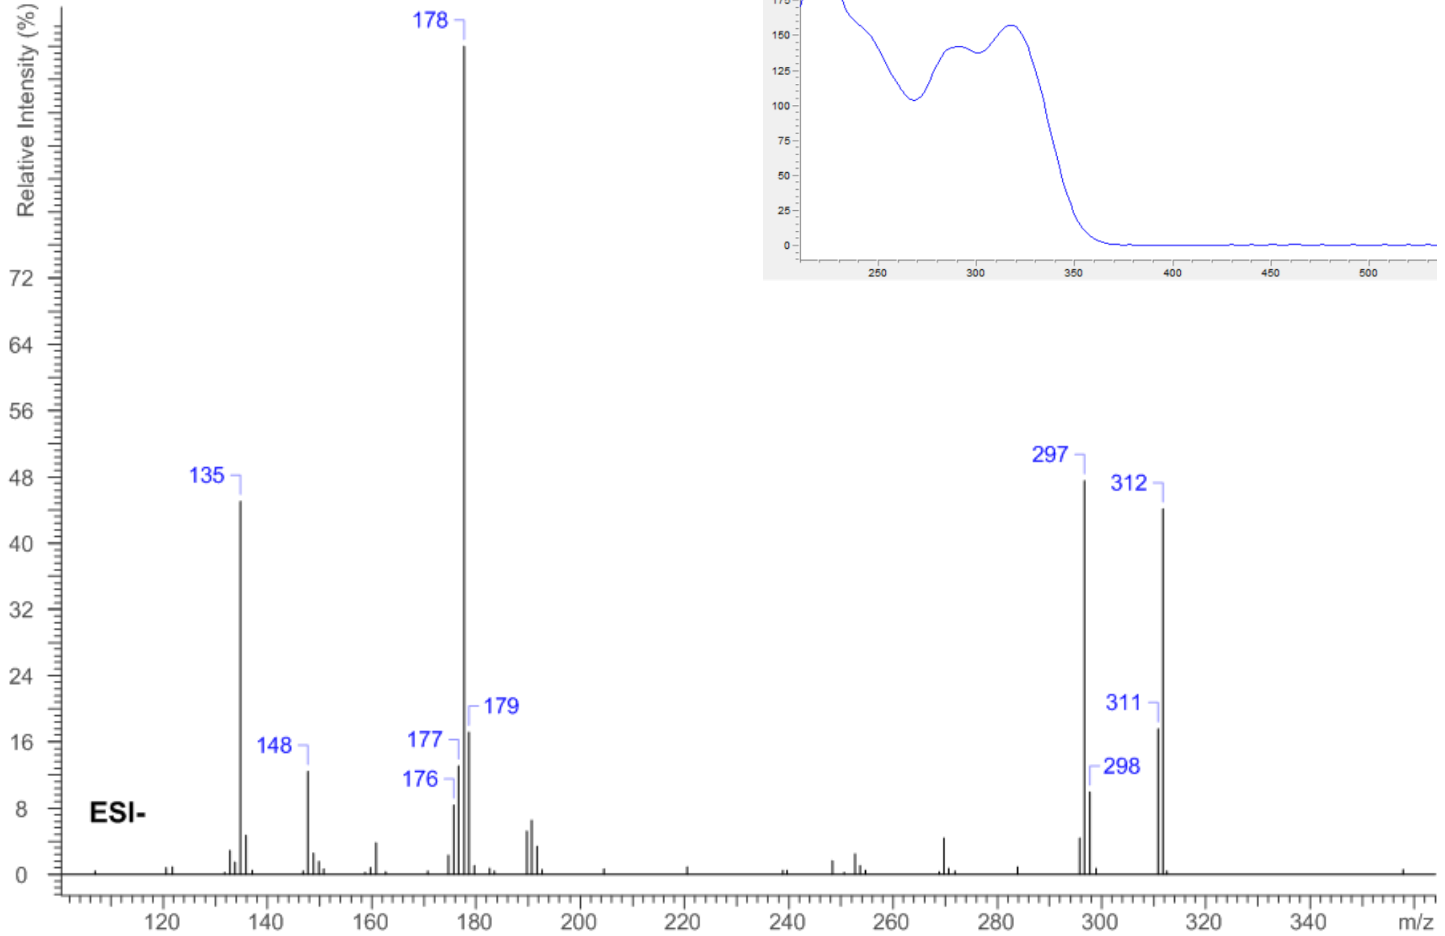

# Cannabisin B isomer 2

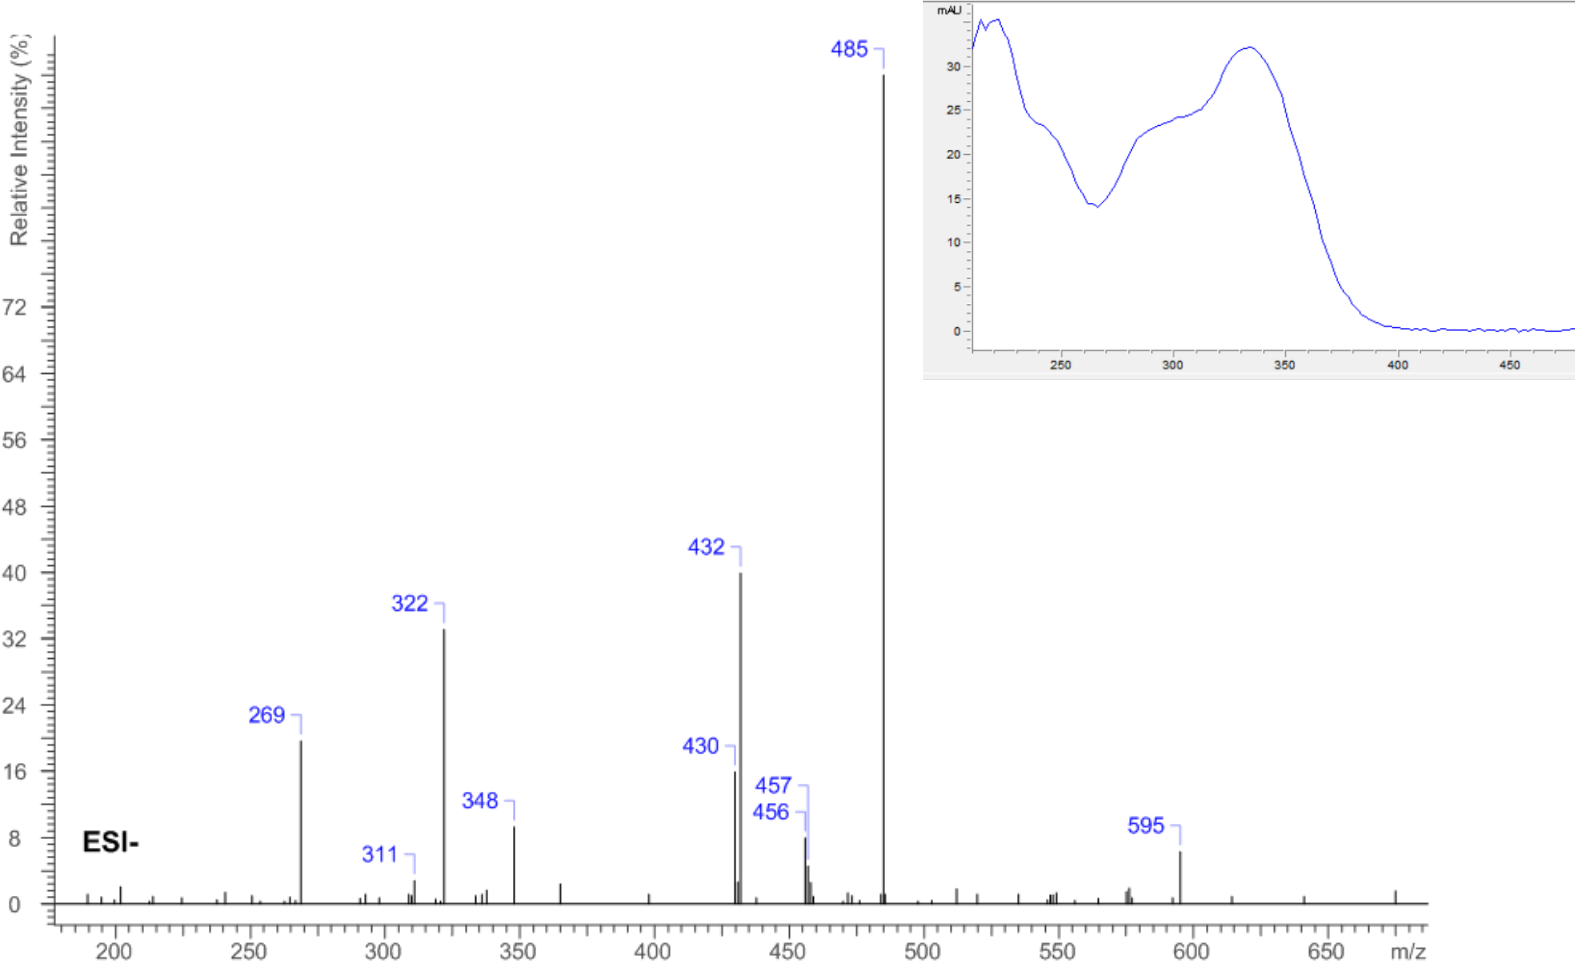

# Demethylgrossamide

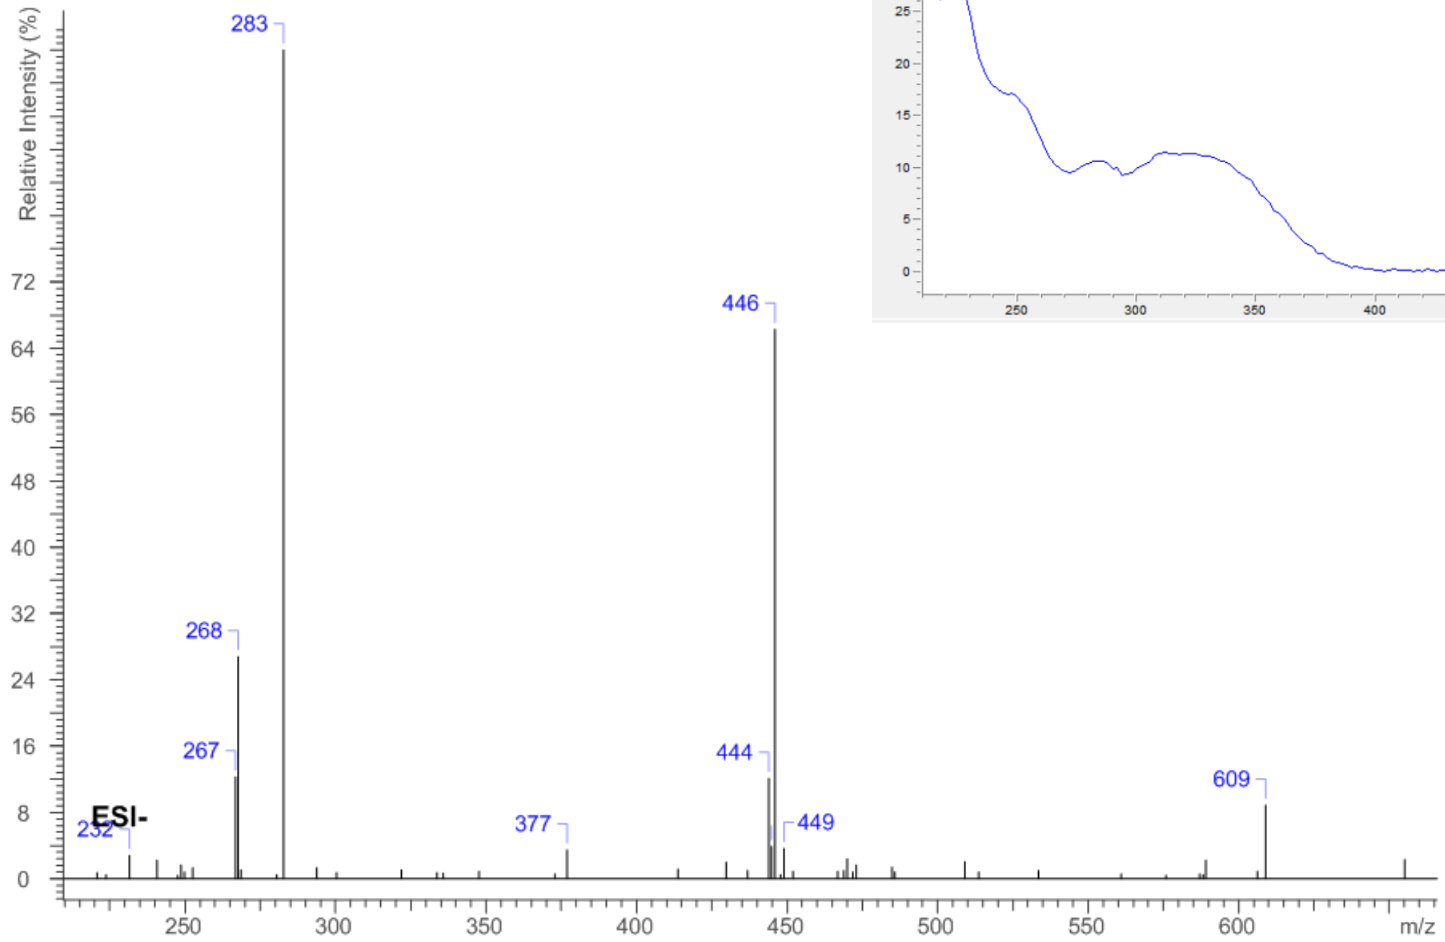

# Cannabisin C

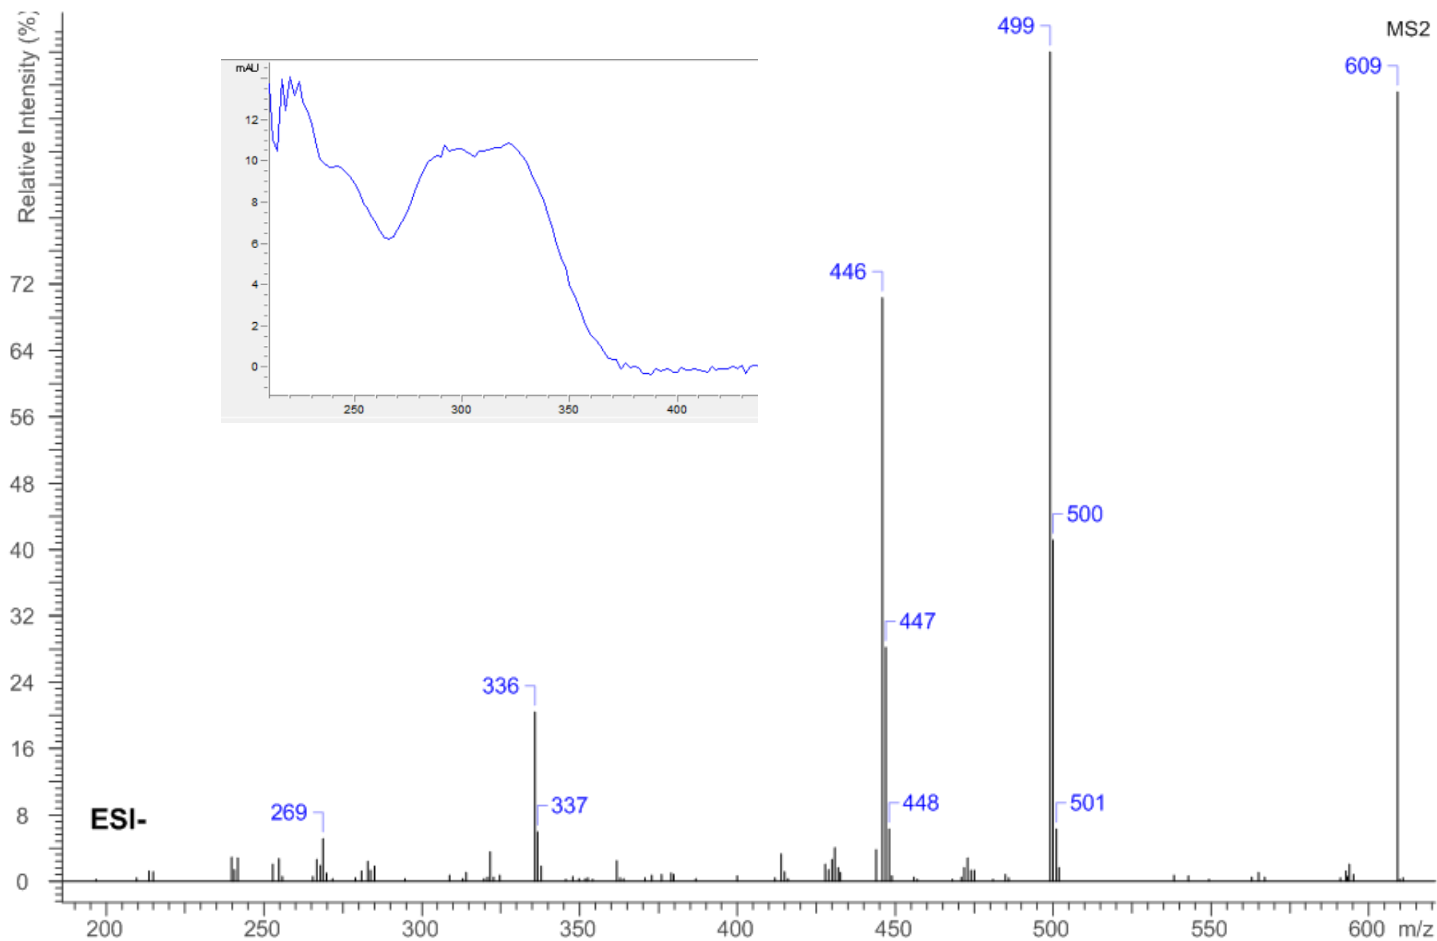

# Cannabisin C isomer

29.7

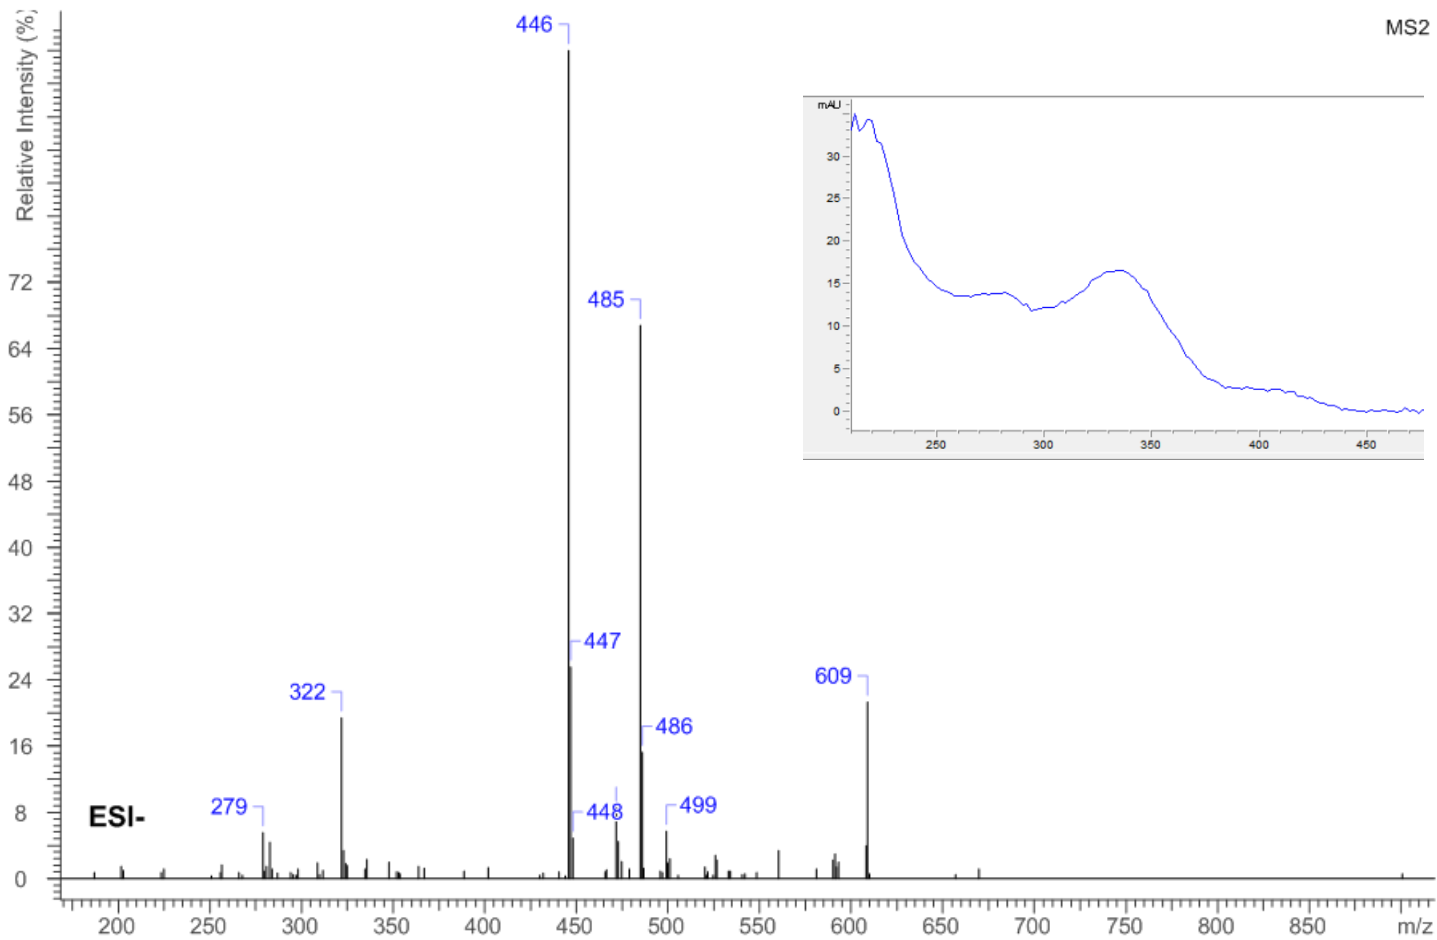

# Cannabisin D

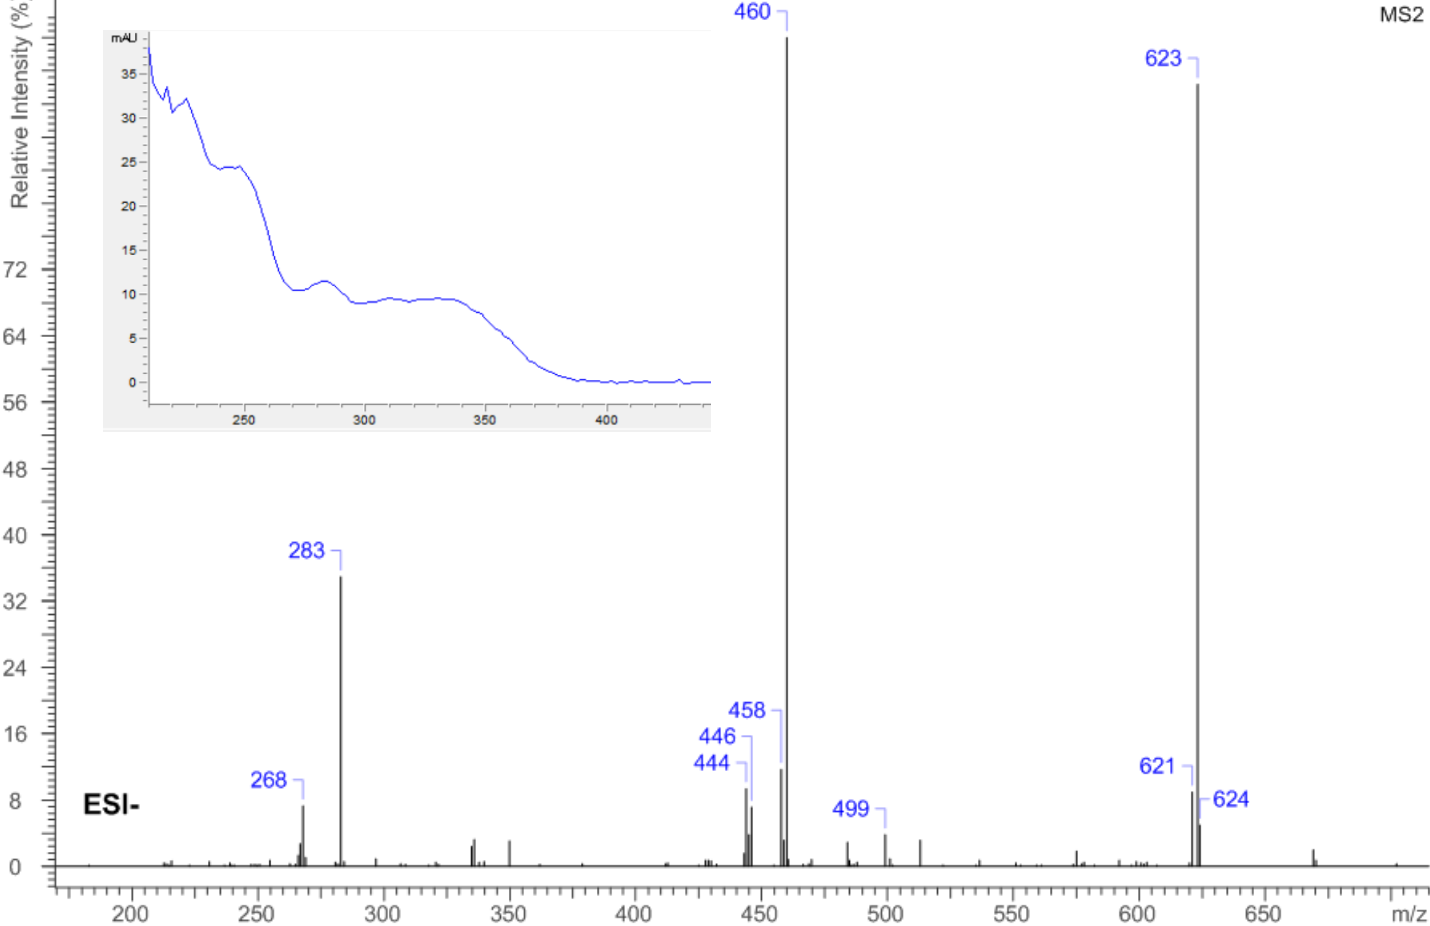

# 3,3-didemethylgrossamide

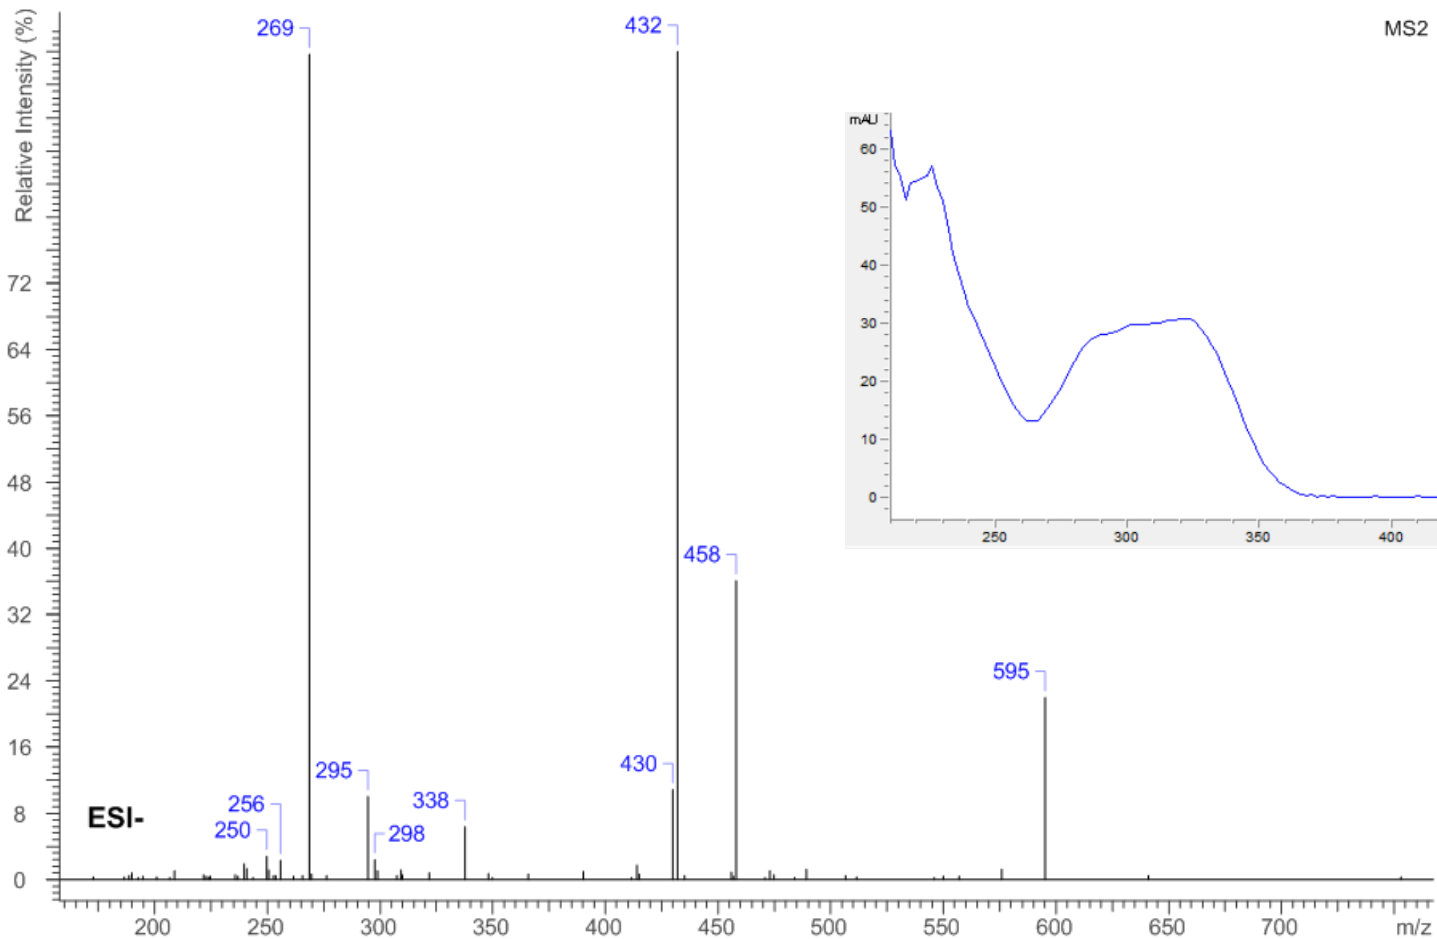

# Tri-p-coumaroylspermidine

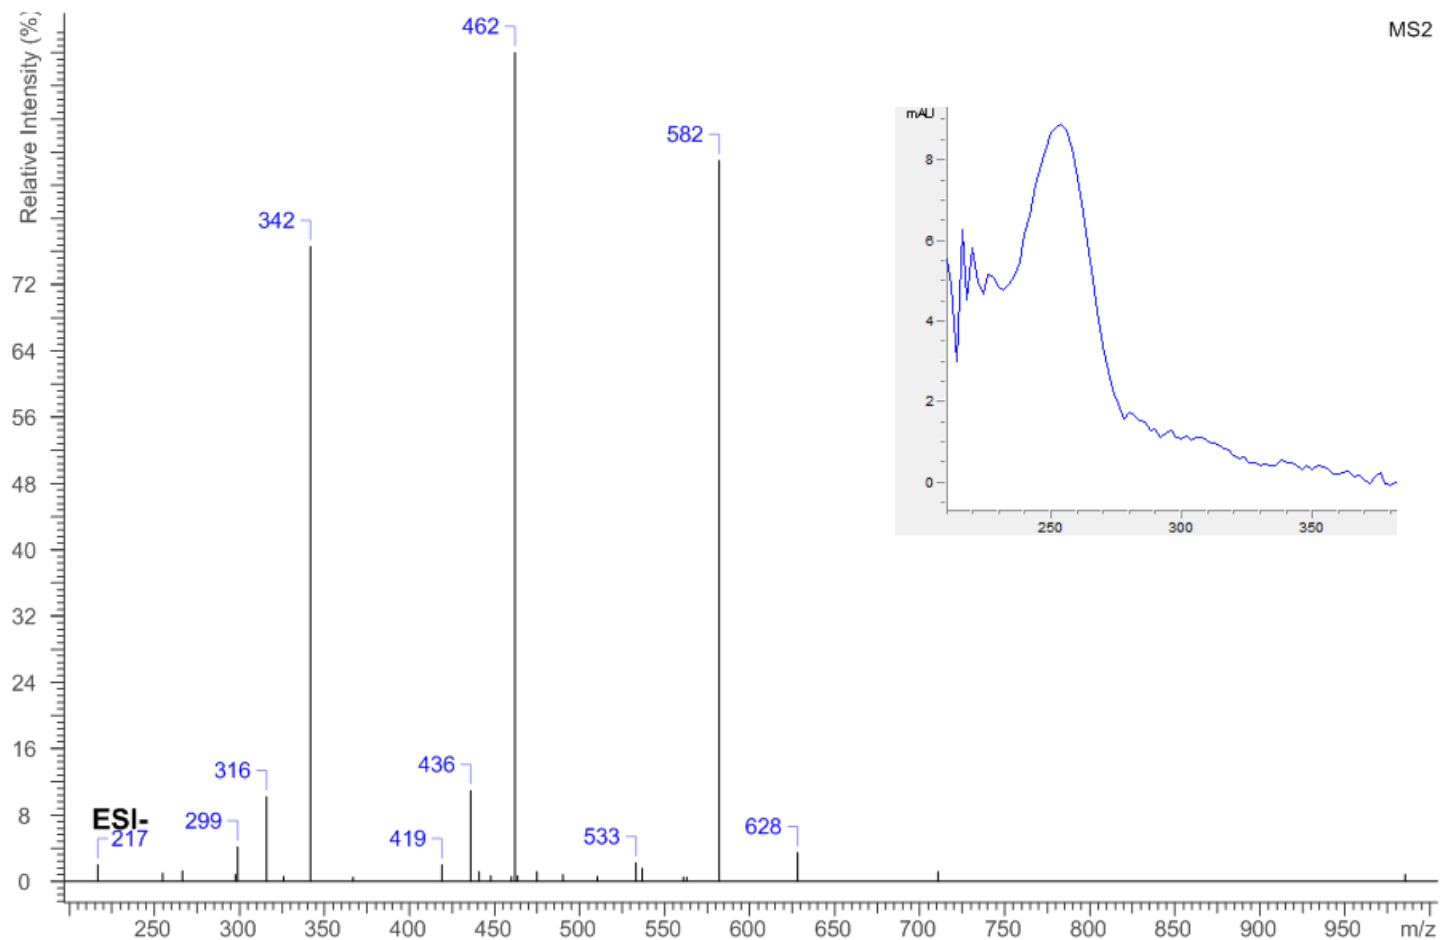



# Cannabisin E

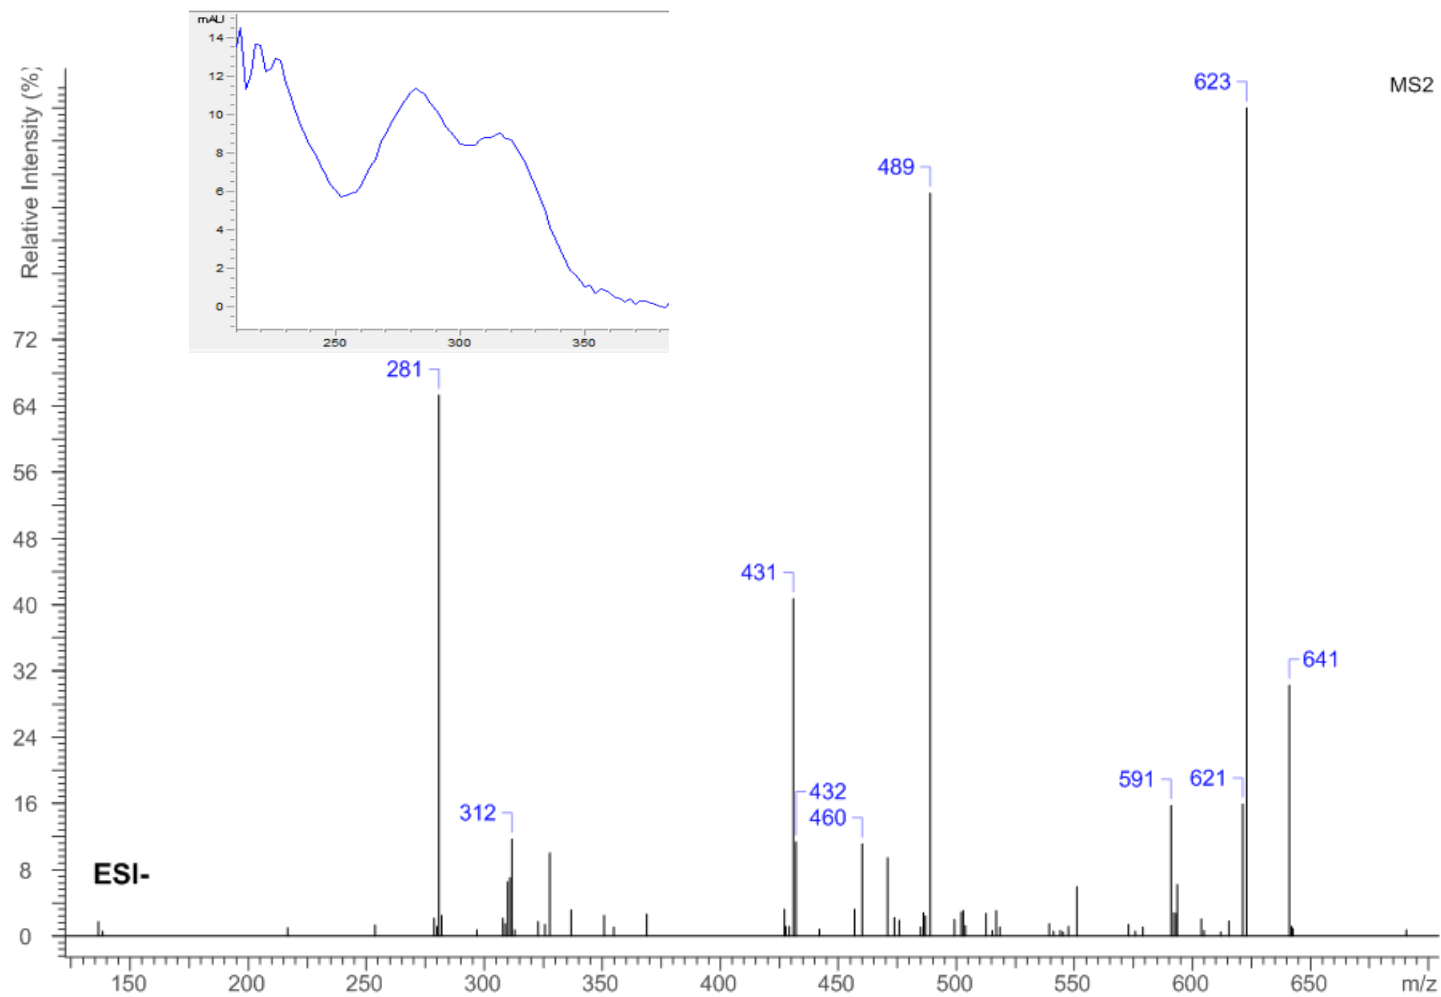

# Grossamide K

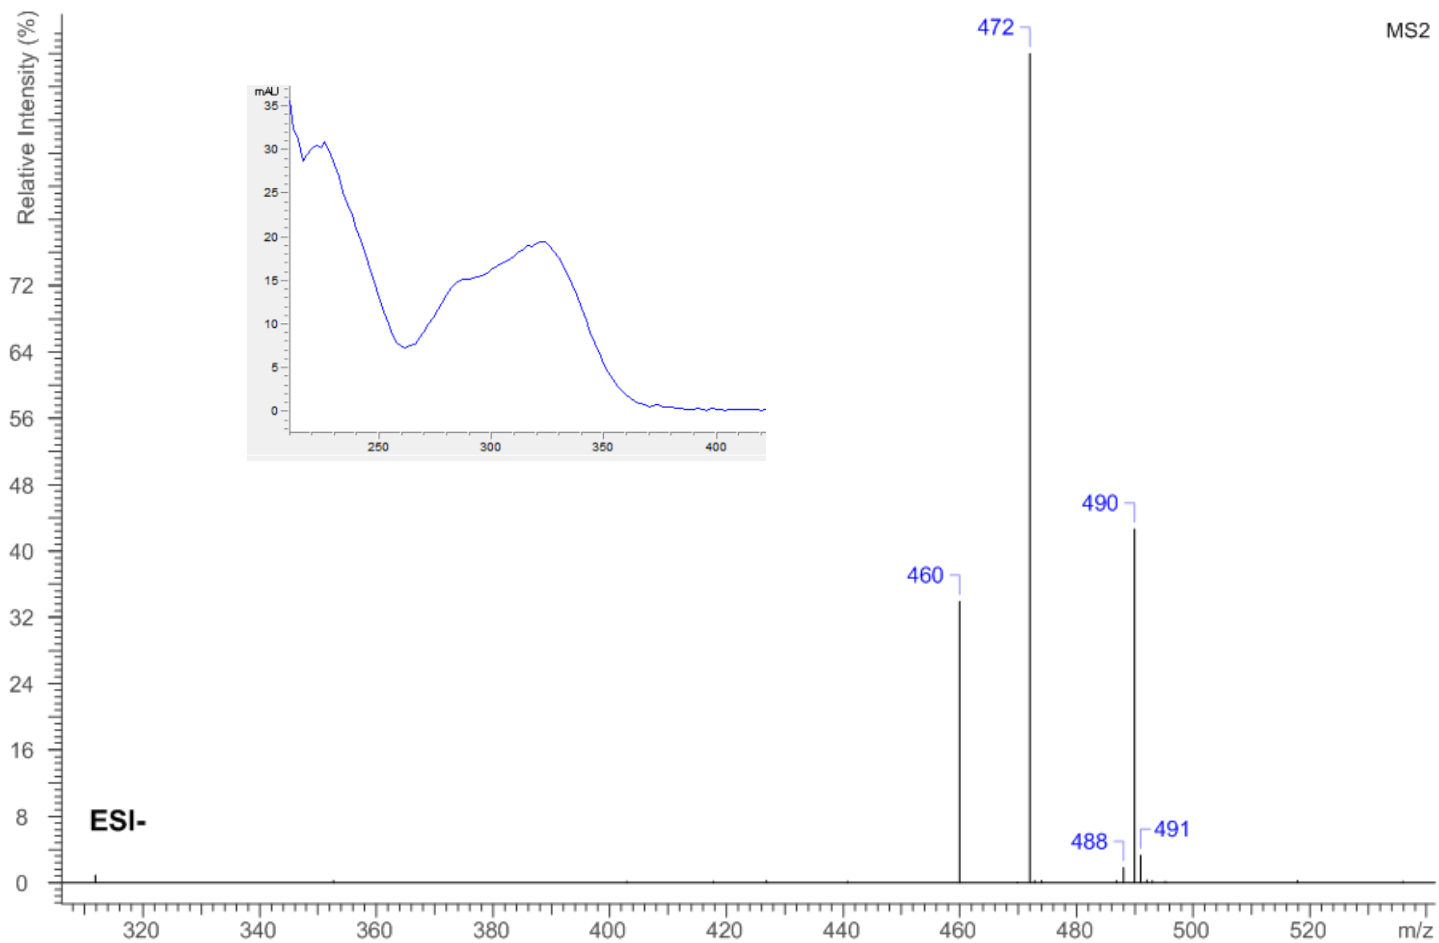

# Cannabisin M

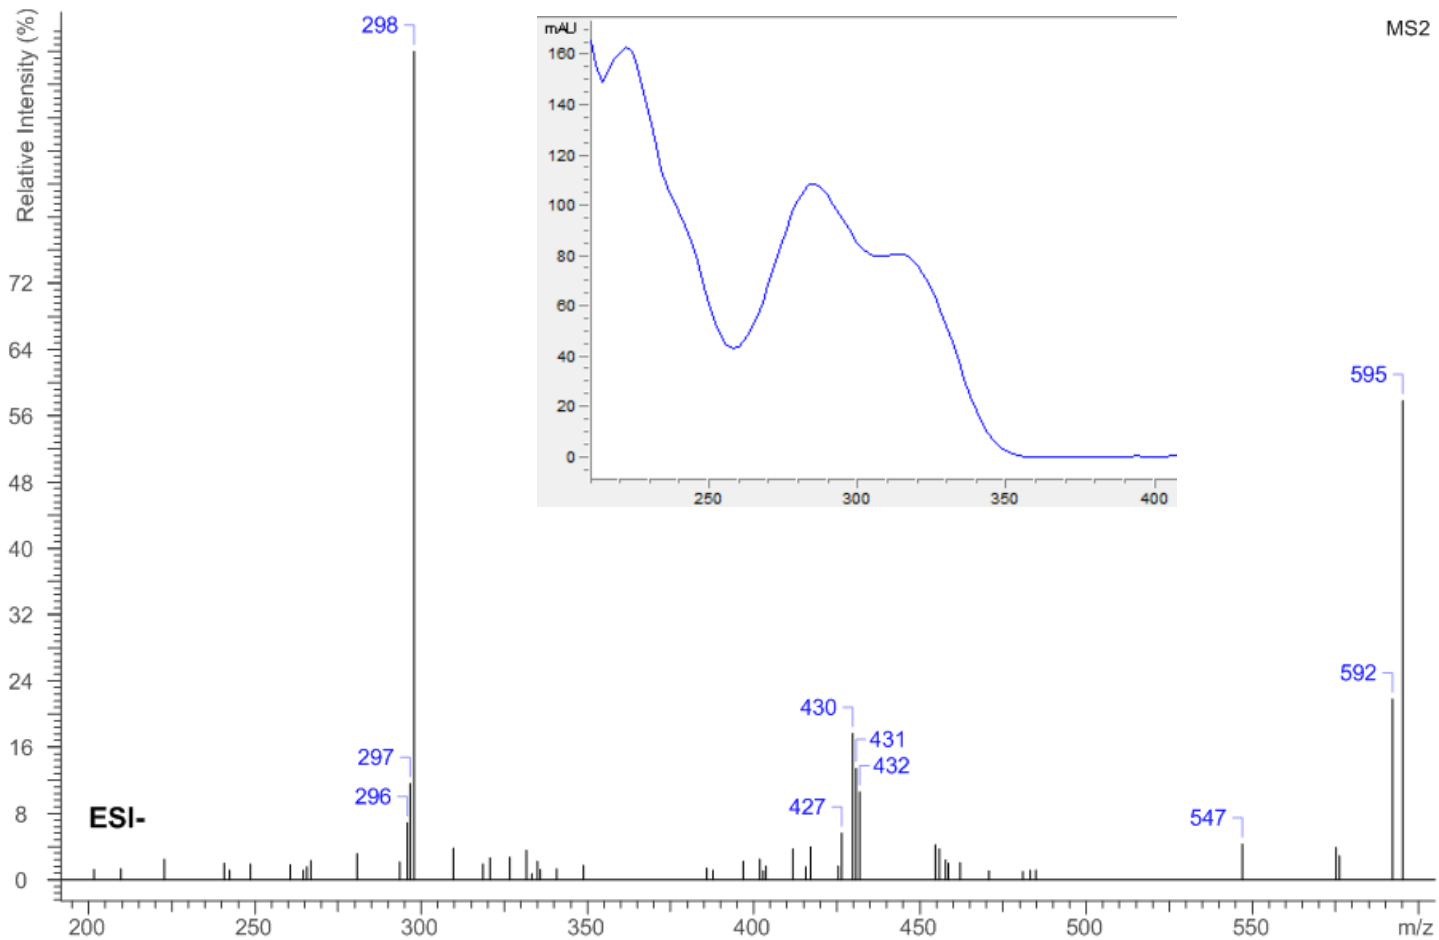

# 3,3'-demethyl-heliotropamide

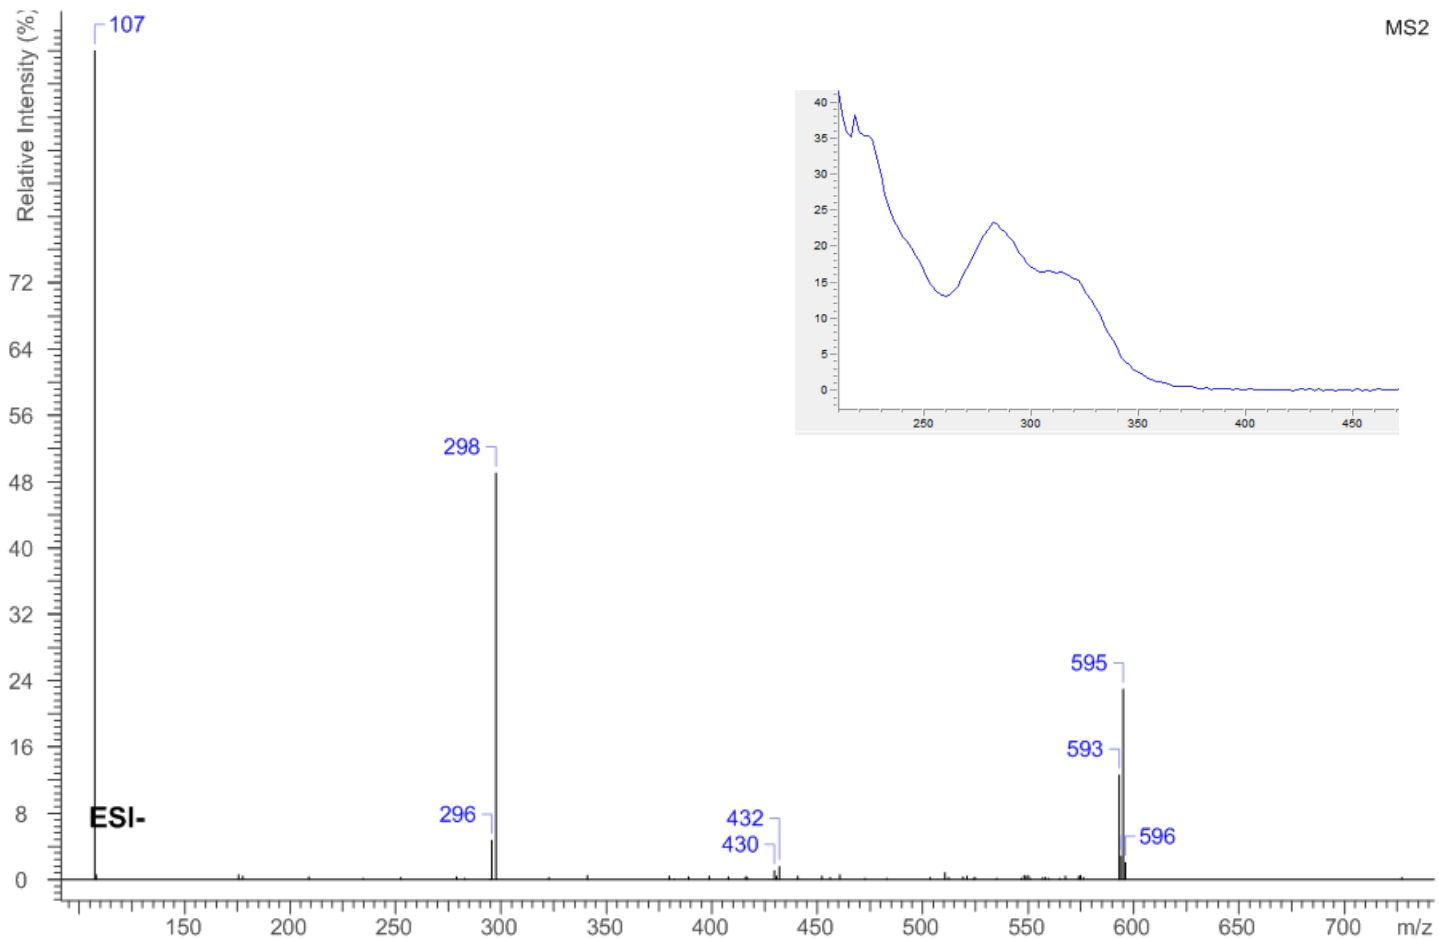

# Unnamed condensed trilignanamide

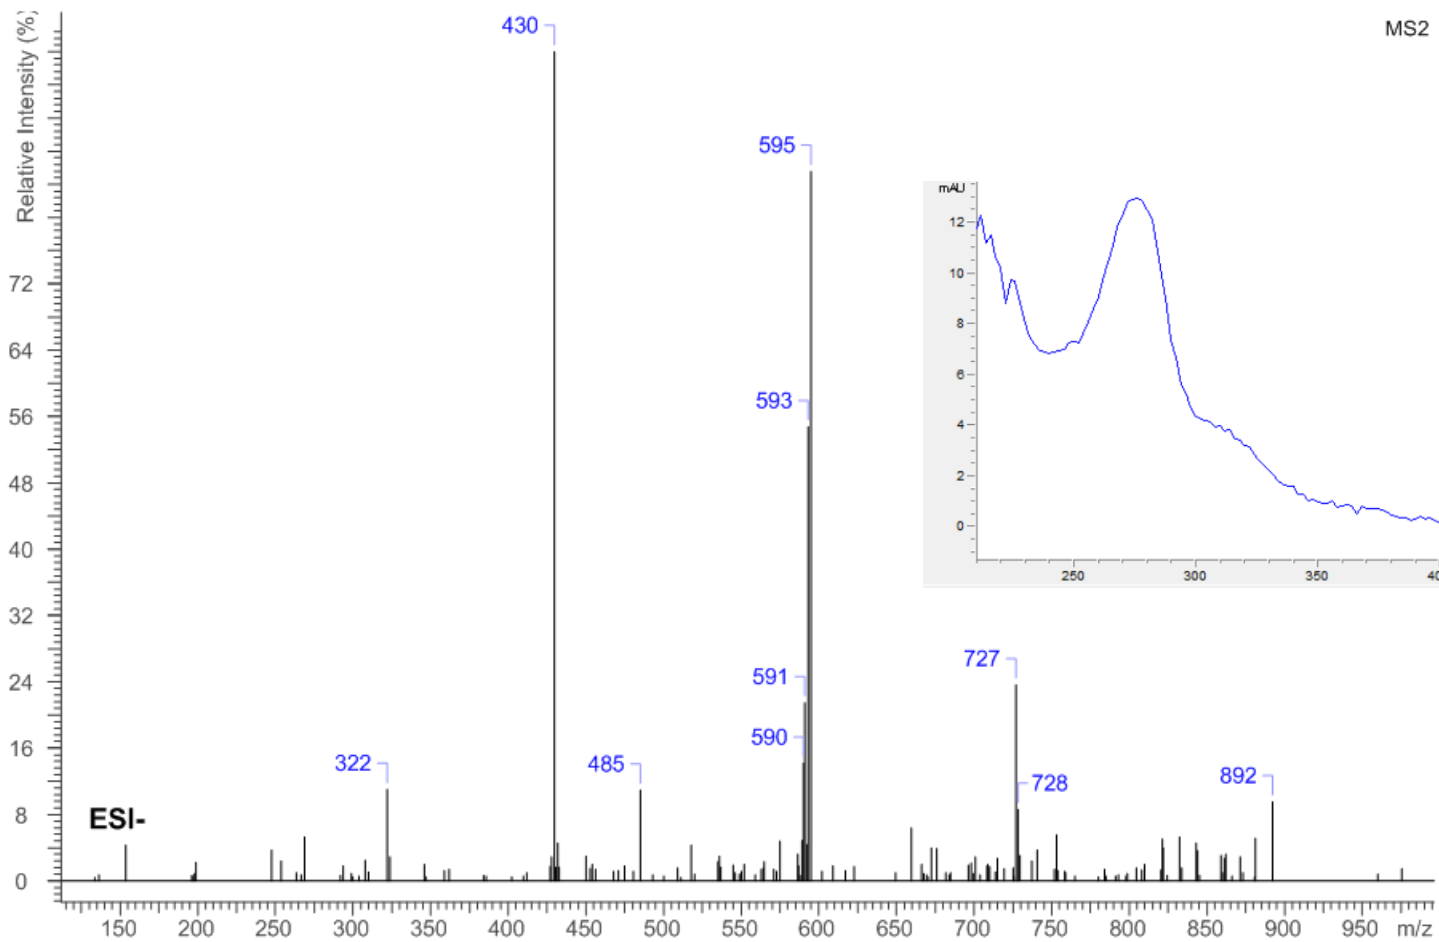

# Cannabisin Q

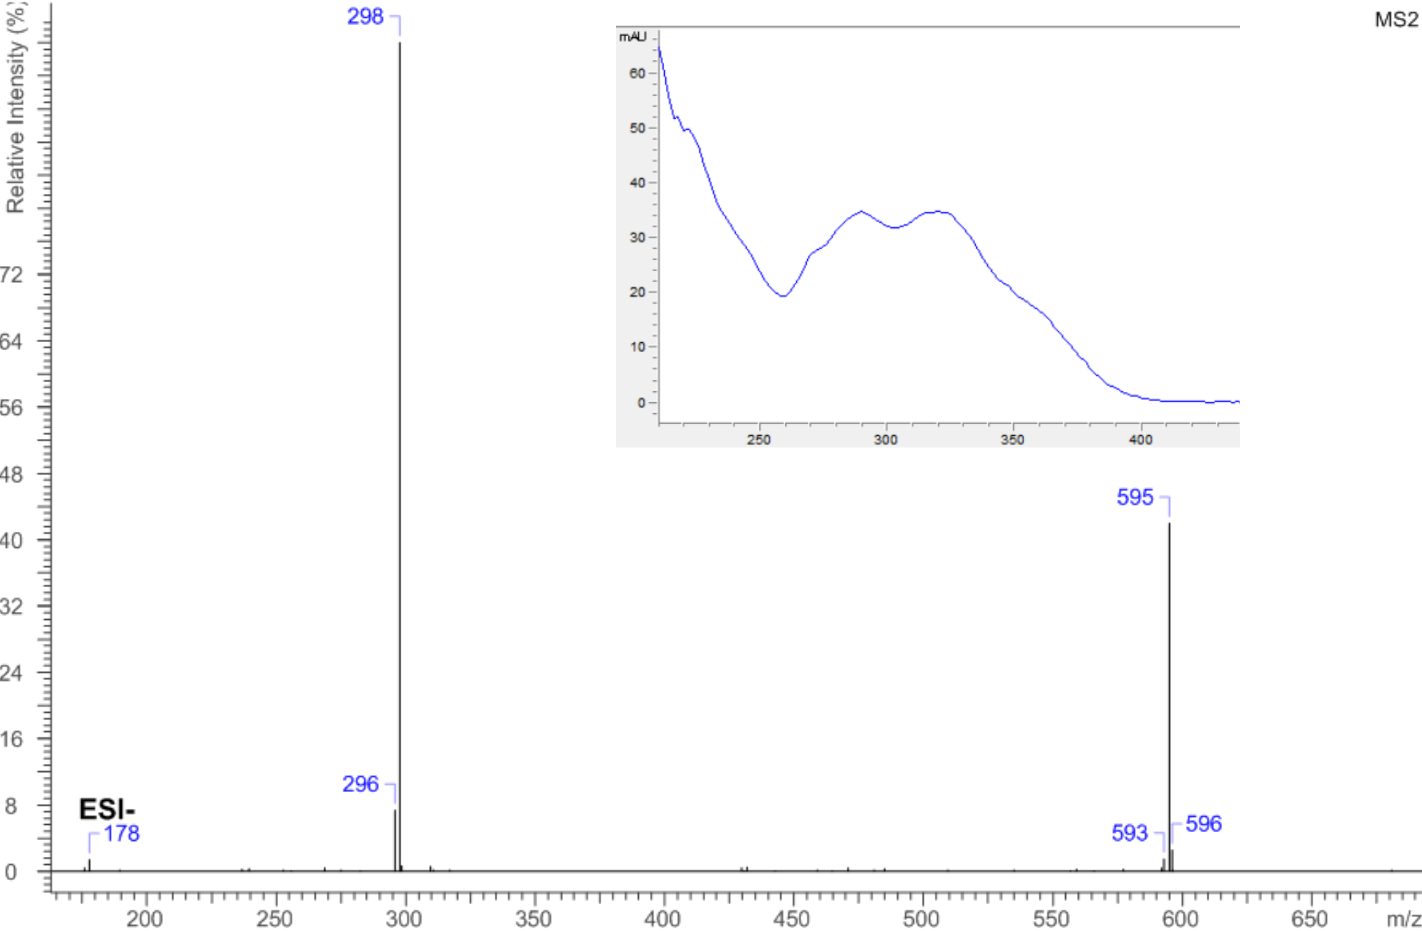

MS2

# Cannabisin F

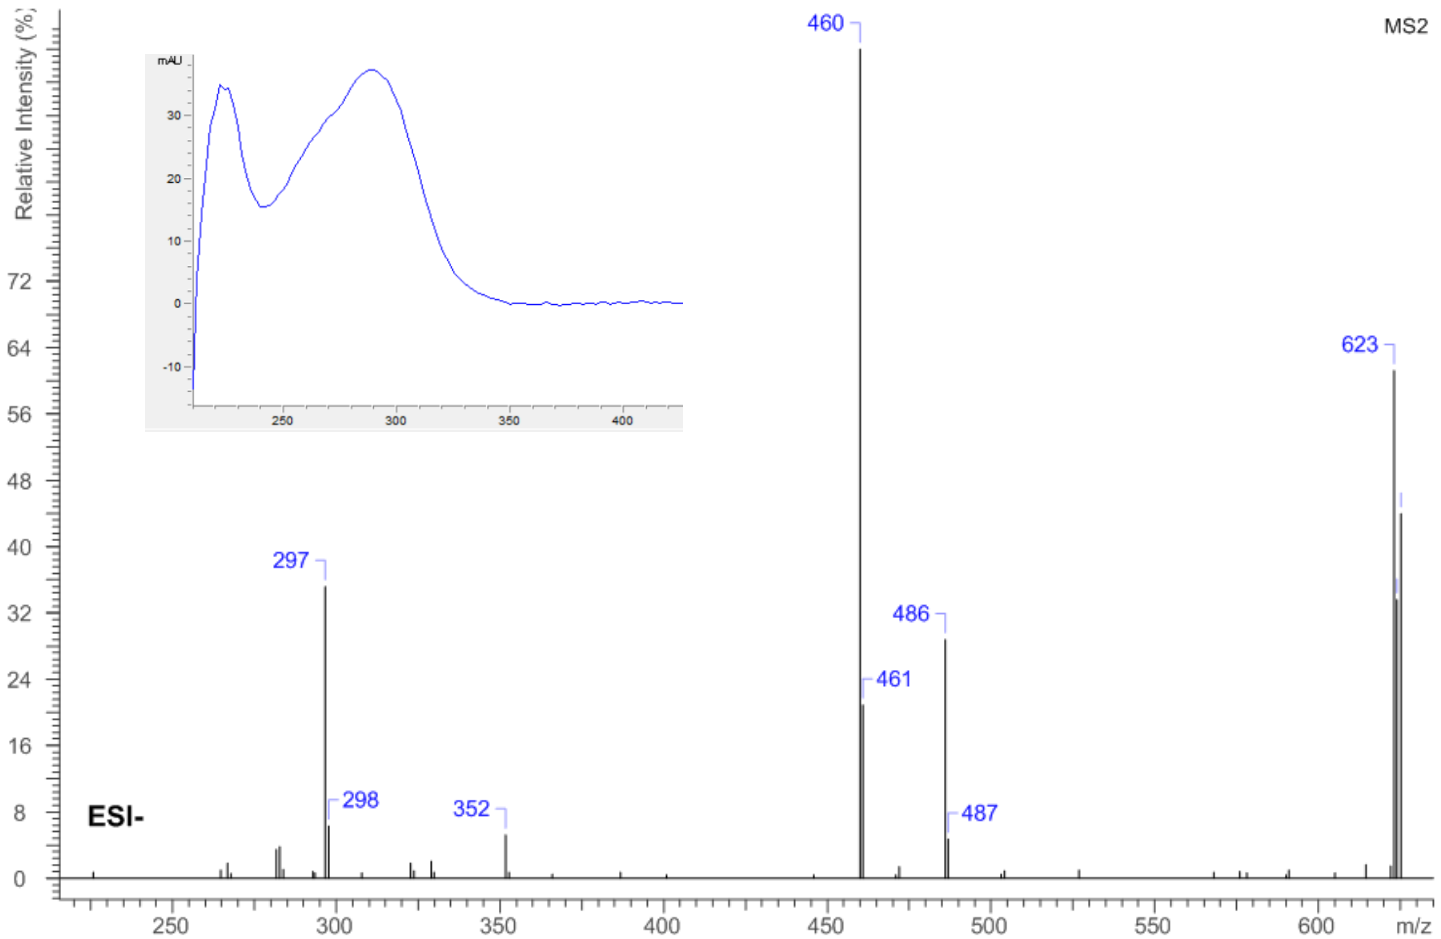

# Isocannabisin N

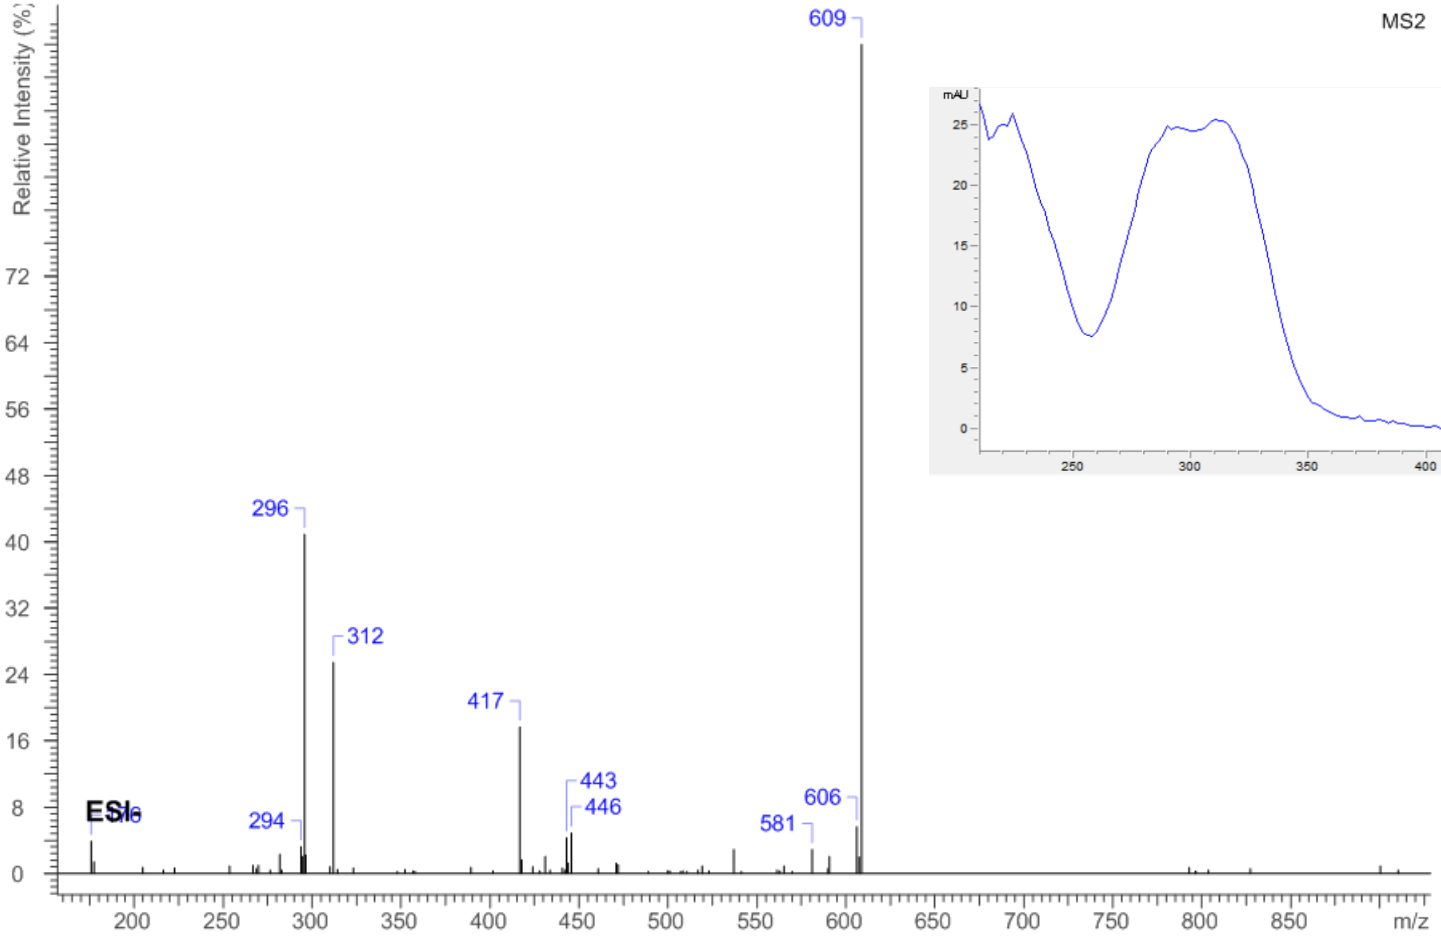



# Grossamide

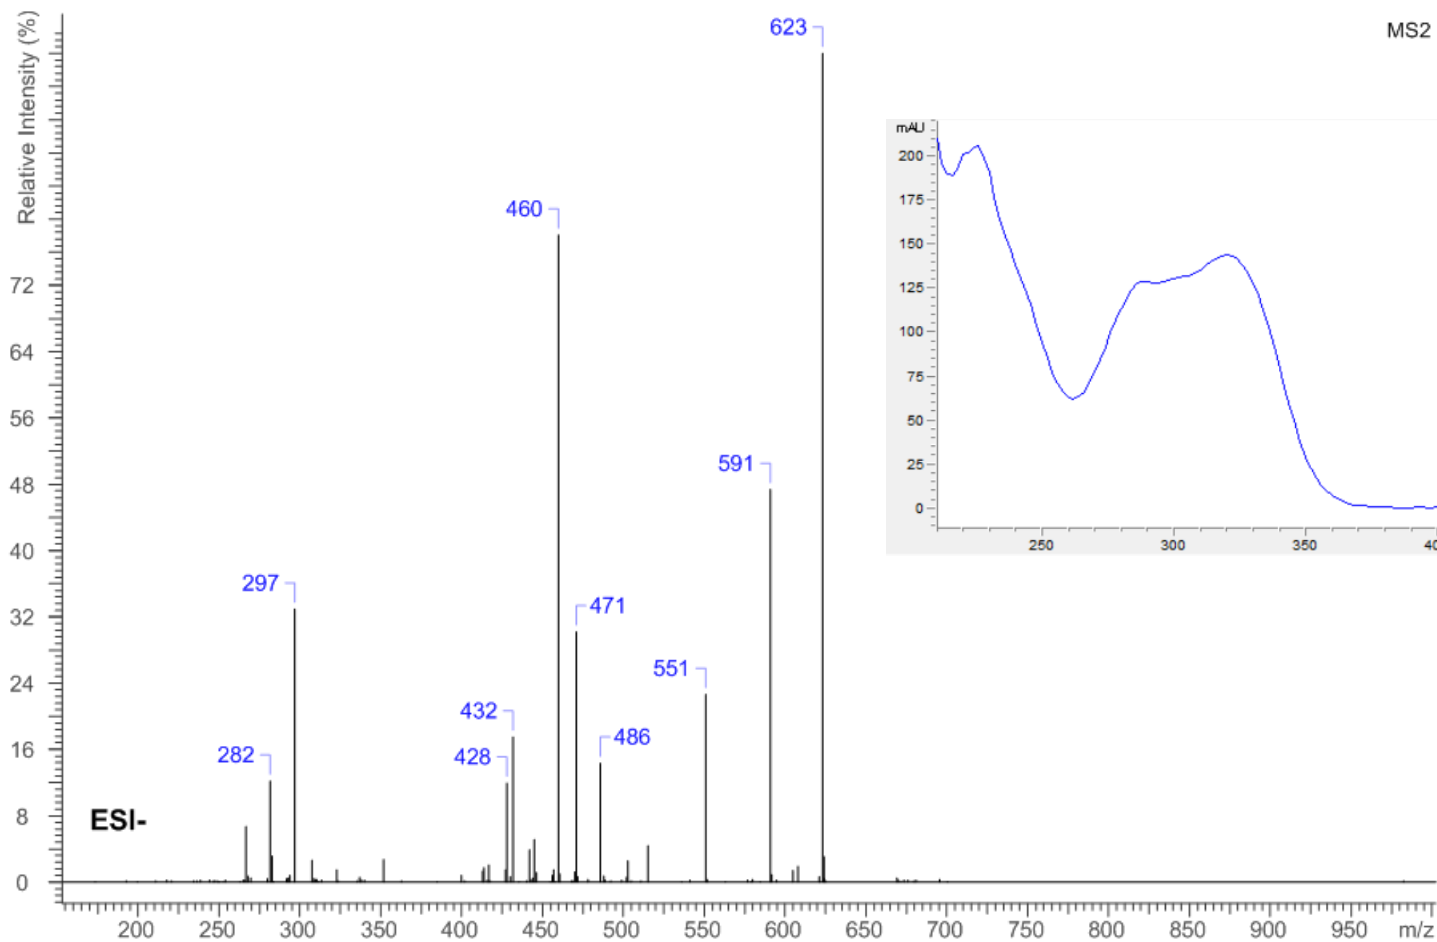

# Unnamed lignanamide

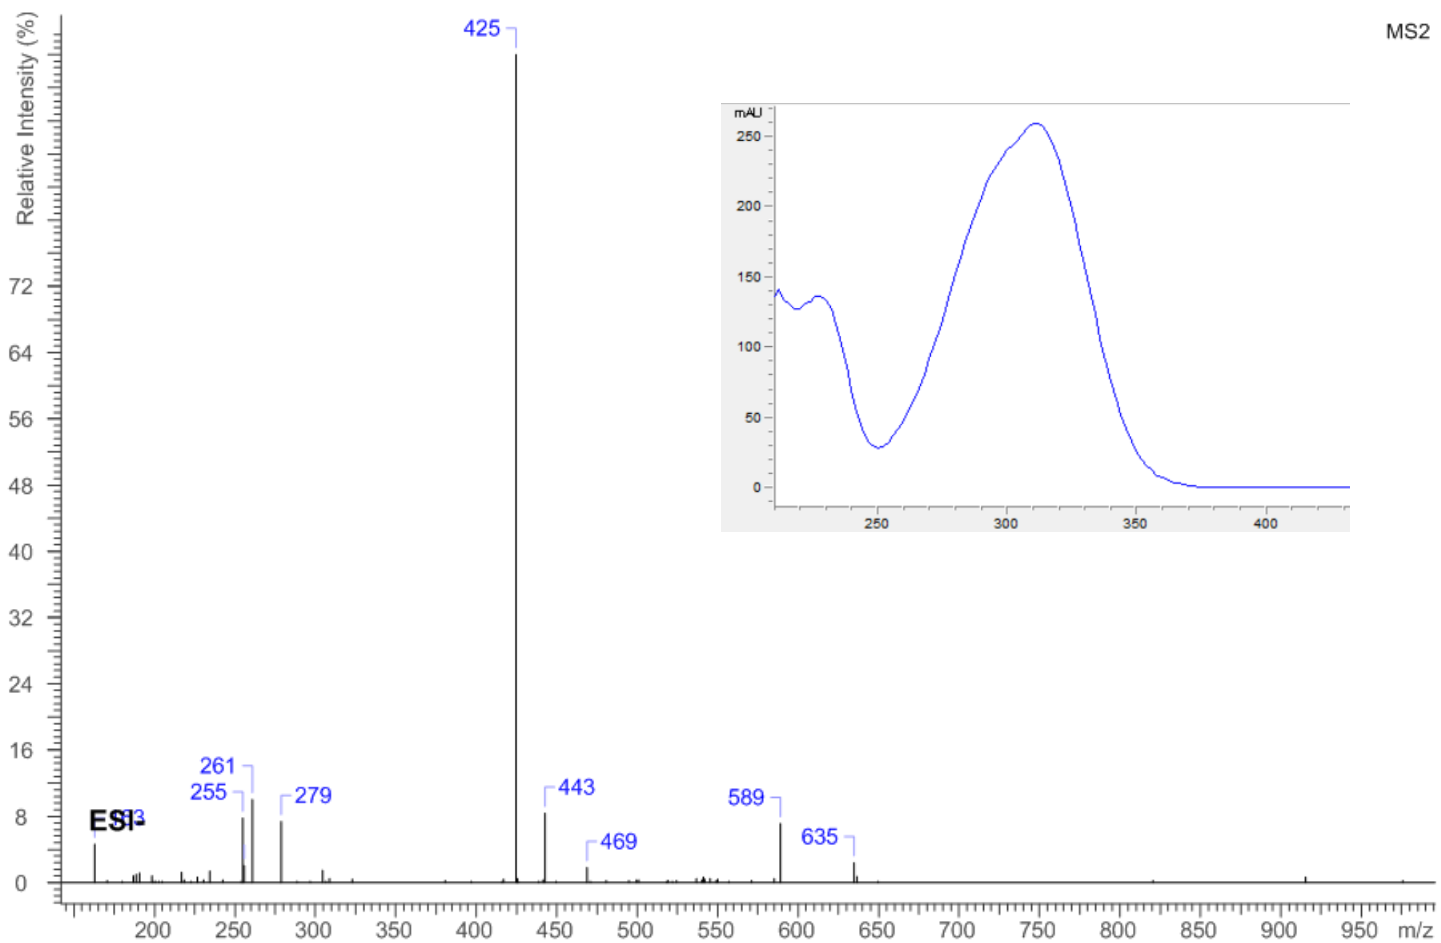

# Dihydrocannabinol

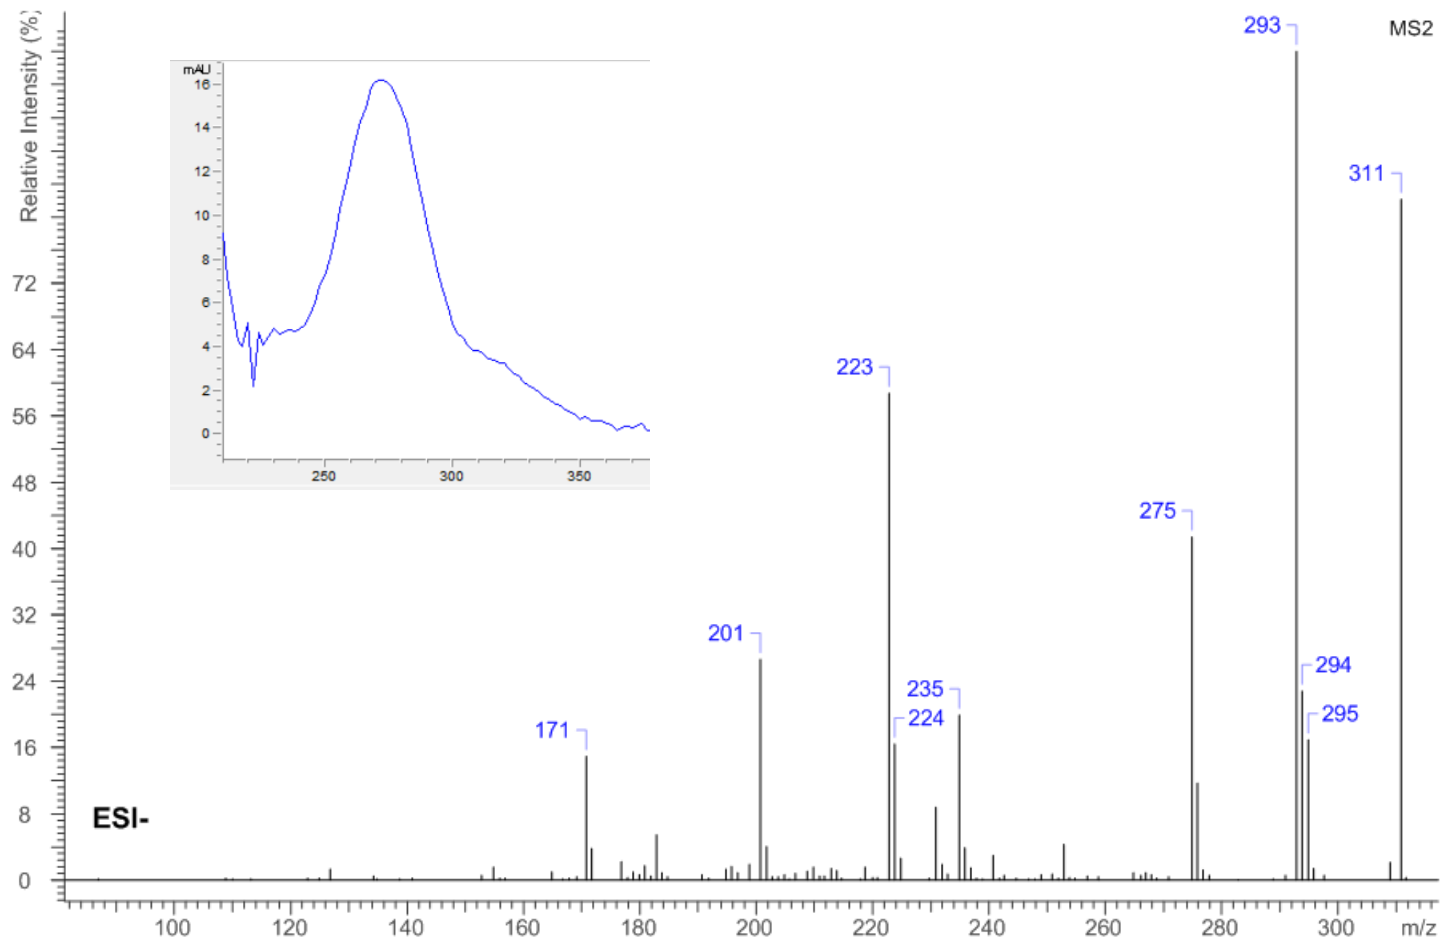

# Cannabidiol (CBD)

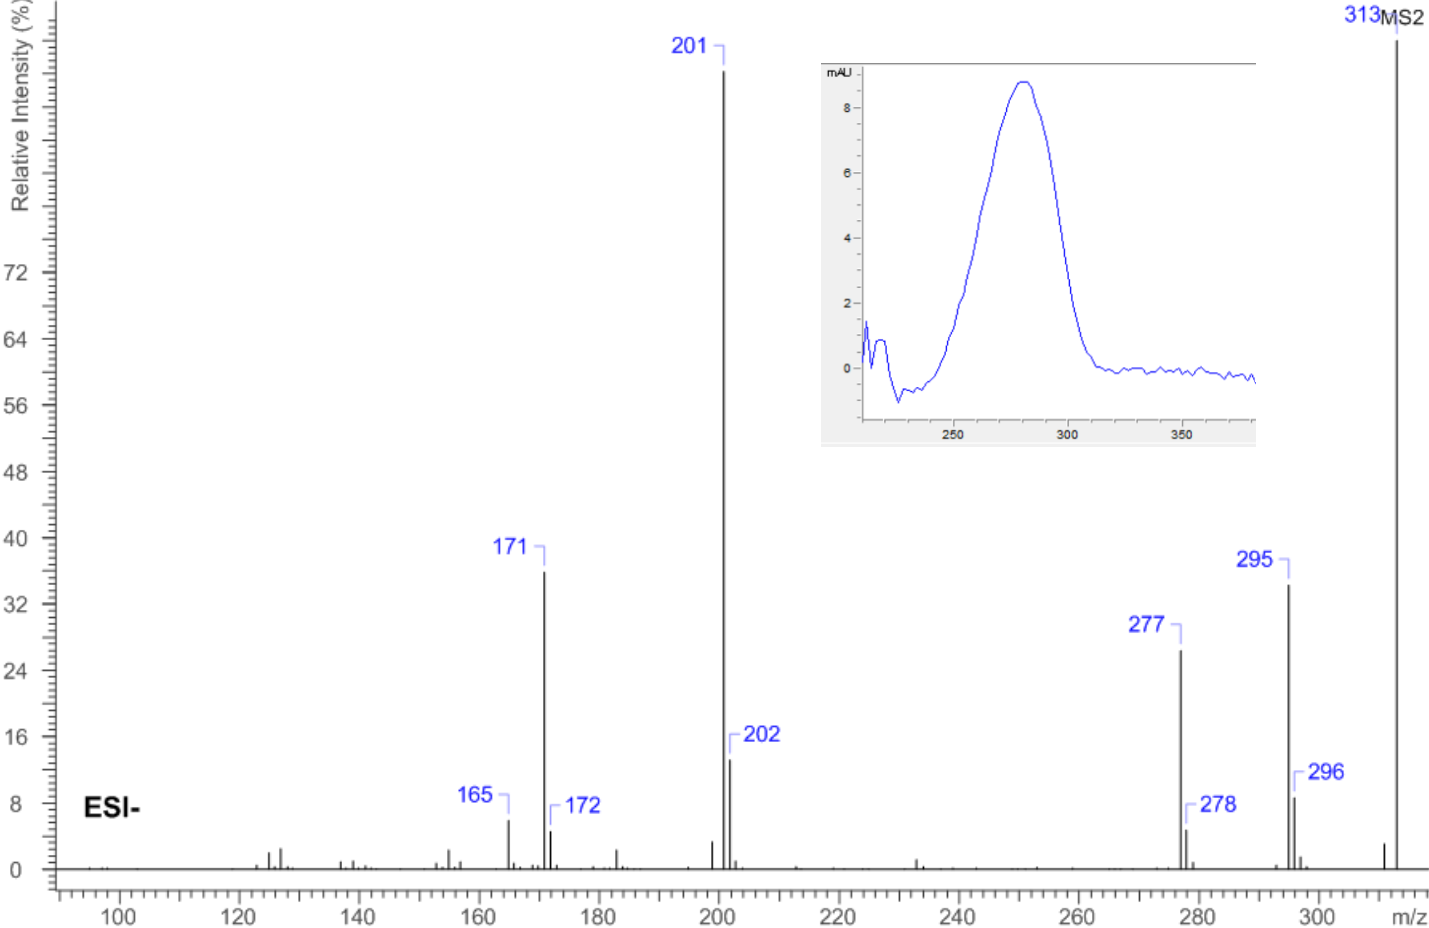

# Cannabielsoic acid

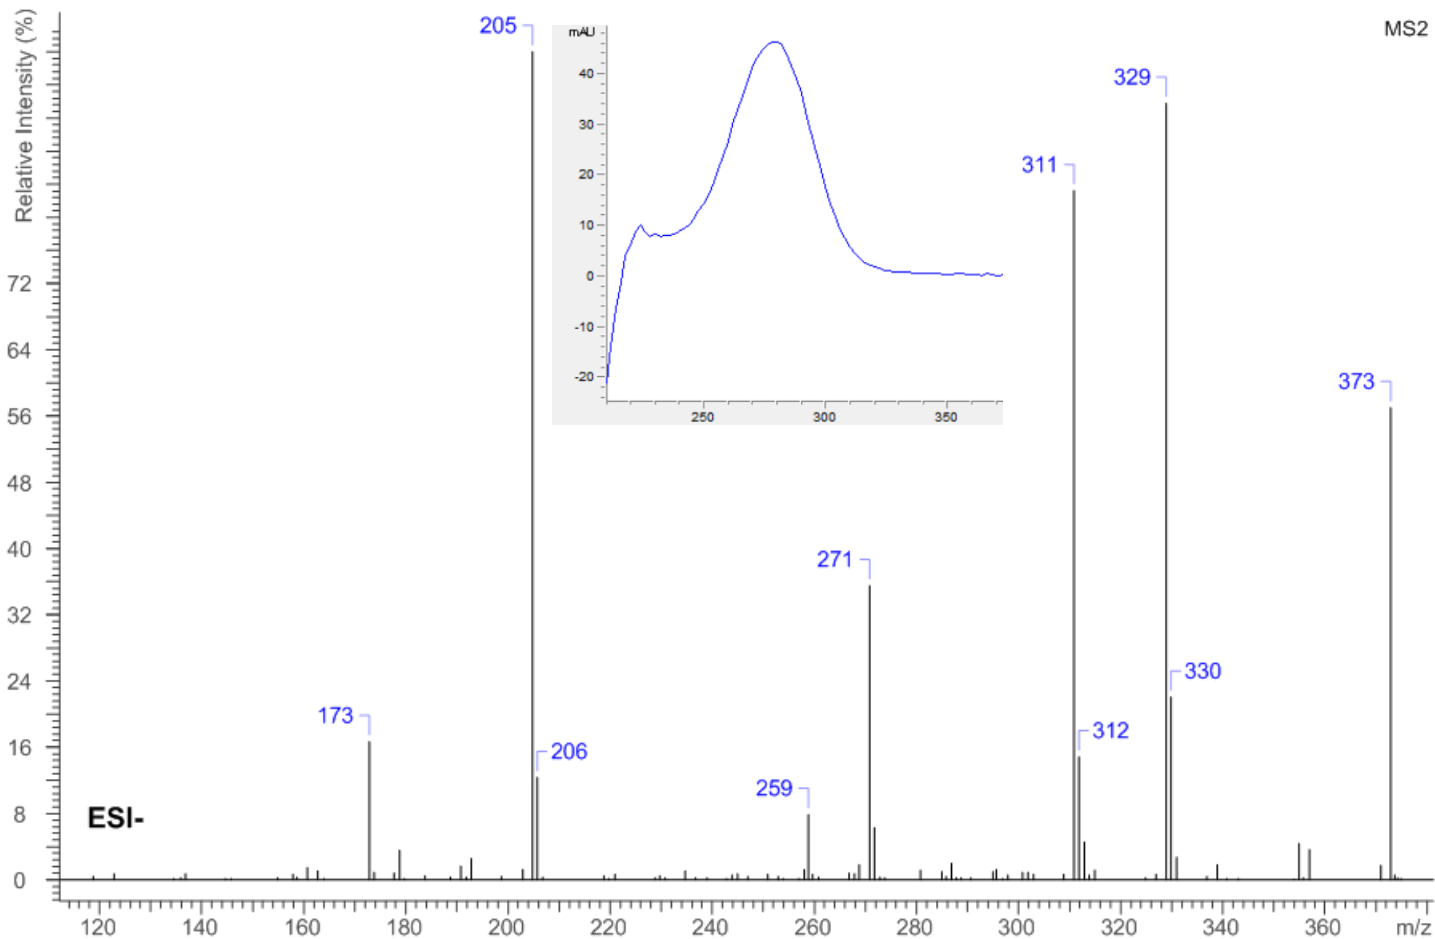

# Sinapic acid

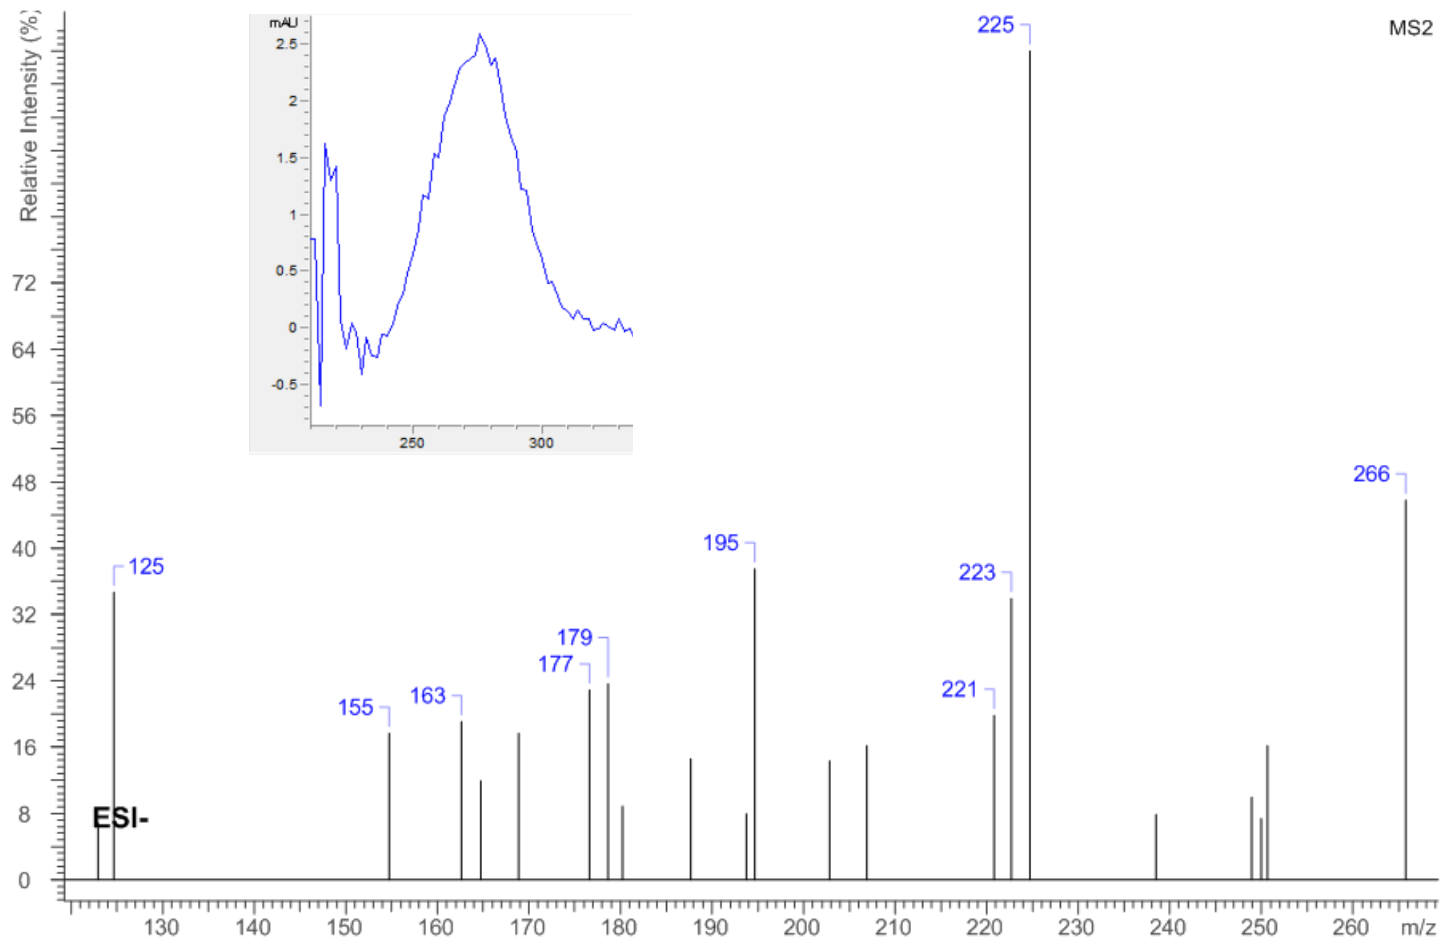

## Cannabidiolic acid (CBDA)

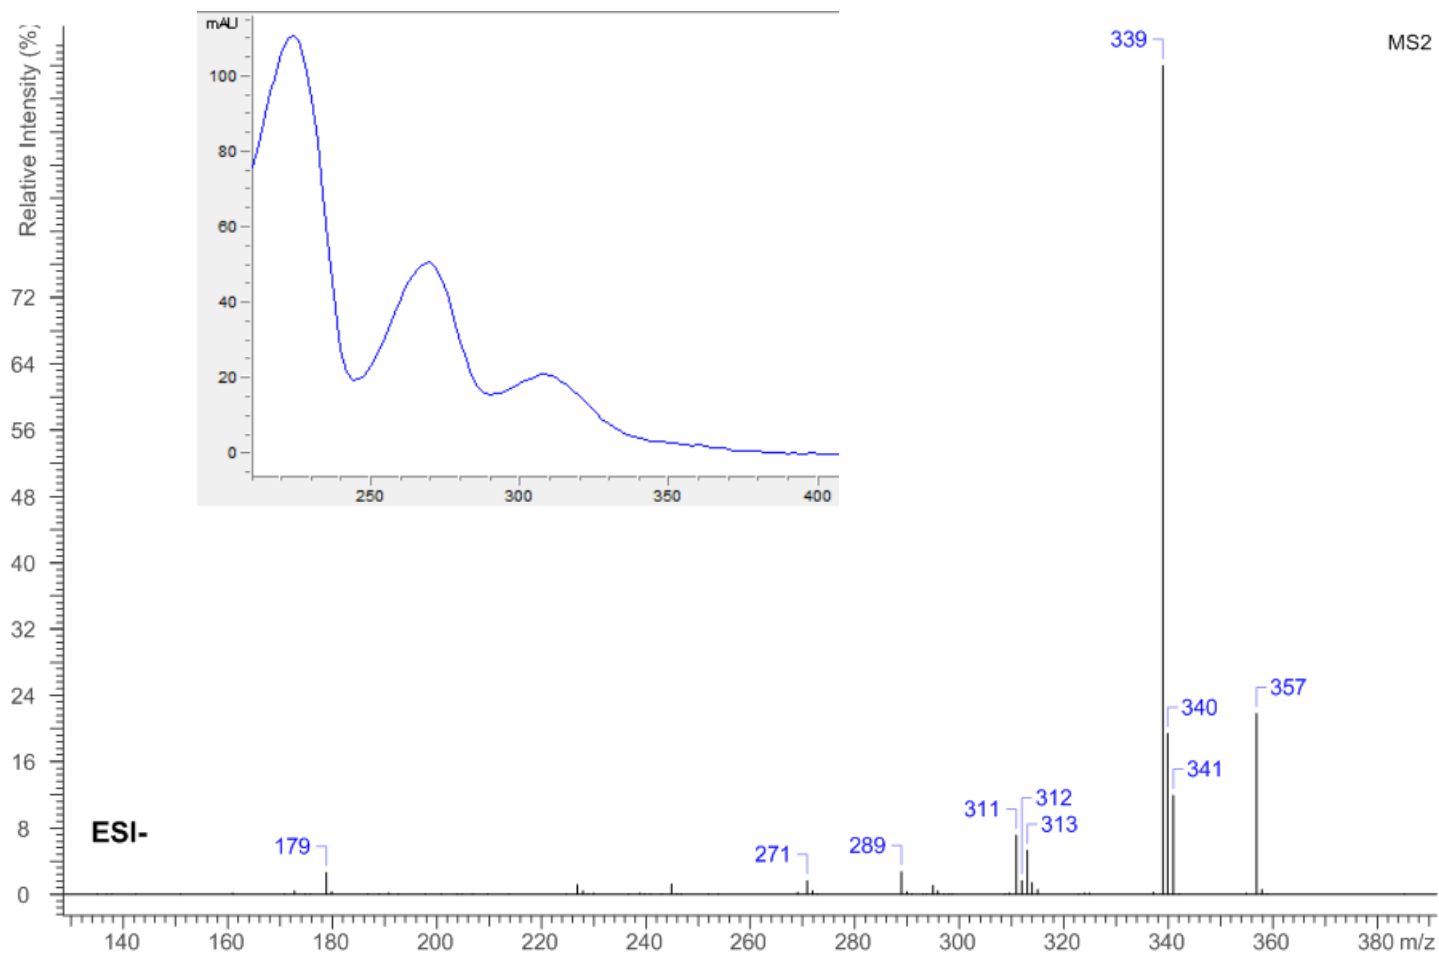

**Figure S2.** MS<sup>2</sup> spectra and UV-DAD spectrum of the identified phenolic compounds extracted from defatted hemp seeds
